# Supplementary material
Source: PubMed Central journal article supplement (PMC5819754)
Supplement: NIHMS941393-supplement-Digital_Content_Patnaik.pdf [file NIHMS941393-supplement-Digital_Content_Patnaik.pdf]

## Supplemental Digital Content

1. *Appendix 1*. External data-sets used for associating microRNA expression with lung squamous cell carcinoma (SCC) and adenocarcinoma (AC) histologies
2. *Appendix 2*. Analyses of microRNA expression in data for lung adenocarcinoma (AC) and squamous cell carcinoma (SCC) in the Cancer Genome Atlas (TCGA) project
3. *Figure S1*. Correlation between microRNA quantifications by reverse transcription (RT)-PCR and microarray assays
4. *Figure S2*. Standard curves for calculation of molarity in reverse transcription (RT)-PCR assays
5. *Figure S3*. Receiver operating characteristic (ROC) analyses for lung cancer histology and *miR-21* and *miR-205* measurements in external data-sets
6. *Figure S4*. Correlation between Lebanony scores and *miR-205*  $\Delta C_q^{U6B}$  values of resected lung cancers
7. *Figure S5*. Expression of *miR-375* in resected lung squamous cell carcinoma (SCC) and adenocarcinoma (AC) tissues
8. *Table S1*. Differential expression of microRNAs in lung squamous cell carcinoma (SCC) and adenocarcinoma (AC) in two external data-sets
9. *Table S2*. Characteristics of lung adenocarcinoma (AC) and squamous cell carcinoma (SCC) cases in data obtained from the Cancer Genome Atlas (TCGA) project
10. *Table S3*. Histotypic microRNAs to distinguish lung squamous cell carcinoma (SCC) from adenocarcinoma (AC) identified in data obtained from the Cancer Genome Atlas (TCGA) project
11. *Table S4*. Characteristics of the cohort of 190 non-small cell lung cancer cases that was evaluated for accuracy of subtyping the cancer by histopathologic examination of biopsies
12. *Table S5*. Characteristics of resected lung cancer samples assayed by reverse transcription (RT)-PCR
13. *Table S6*. Characteristics of biopsied lung cancer samples assayed by reverse transcription (RT)-PCR
14. *Table S7*. Raw and calibrated quantification cycle ( $C_q$ ) values obtained in reverse transcription (RT)-PCR assays

15. *Table S8*. Relative expression, Lebanony score, and molarity values of microRNAs and *U6B* in RNA of lung cancer resectates and biopsies

## Appendix 1

### *External data-sets used for associating microRNA expression with lung squamous cell carcinoma (SCC) and adenocarcinoma (AC) histologies*

A list of published studies that examined microRNA expression in lung cancer was created using references provided in four publications on meta-analysis of biomarker potential of lung cancer-associated microRNAs (Guan et al., *Journal of Experimental and Clinical Cancer Research*, 31:54, 2012; Ma et al., *Asian Pacific Journal of Cancer Prevention*, 13:2329-34, 2012; Vösa et al., *International Journal of Cancer*, 132[12]:2884-93, 2013; Yang et al., *European Journal of Cancer*, 49[3]:604-15, 2013). Among the original research studies, the following four were identified to have publicly available expression data for *miR-21* and *miR-205* for  $\geq 24$  each of SCC and AC cases.

(1) Lu study (203 AC and 98 SCC cases, pathologic stage I; RNA extracted from formalin-fixed and paraffin-embedded [FFPE] cancer tissue with  $\geq 70\%$  tumor content): Histology and expression data obtained using Human v2 microRNA Panel BeadChip™ microarray with 1,146 unique probes (Illumina®, San Diego, CA) by Lu et al. (*Carcinogenesis*, 33[5]:1046-64, 2012) was procured from Gene Expression Omnibus database of the National Center for Biotechnology Information, United States with accession number GSE29135. The quantile-normalized,  $\log_2$ -transformed microarray signal data was filtered to remove duplicate samples and signals from probes not annotated as being against a mature human microRNA sequence registered in the miRBase repository.

(2) Patnaik study (51 AC and 26 SCC cases, pathologic stage I; RNA extracted from FFPE cancer tissue with  $\geq 70\%$  tumor content): Histology and expression data obtained using miRCURY™ version 10.0 microRNA microarray with 752 unique probes against human microRNAs (Exiqon®, Vedbaek, Denmark) by Patnaik et al. (*Cancer Research*, 70[1]:36-45, 2010) were procured from ArrayExpress database of the European Bioinformatics Institute with accession number E-TABM-727. Raw microarray signal data was processed and quantile-normalized as described in the publication. RNAs recognized by probes for which the microarray Hy3™ signal values were  $\geq 3x$  that of probe-less empty microarray spots for at least a quarter of the samples were considered as expressed. Microarray signal data was then filtered to remove signals from probes whose target RNAs were not considered as expressed or were not mature human microRNA sequences registered in the miRBase repository.

(3) Yanaihara study (51 AC and 24 SCC cases, pathologic stage I-III; RNA extracted from frozen cancer tissue with unknown tumor content): Histology and expression data obtained using a custom DNA oligonucleotide microarray with 352 unique probes by Yanaihara et al. (*Cancer Cell*, 9[3]:189-98, 2006) were procured from ArrayExpress database of the European Bioinformatics Institute with accession number E-TABM-22. The median-normalized,  $\log_2$ -transformed microarray signal data was filtered to remove samples without *miR-21* or *miR-205* measurements.

(4) Yu study (55 AC and 50 SCC cases, pathologic stage I-III; RNA extracted from frozen cancer tissue with unknown tumor content): Histology and expression data (quantification cycle [ $C_q$ ] values) normalized to that of the *U6* small, housekeeping RNA(s) and obtained using TaqMan™ Human MicroRNA Reverse Transcription (RT)-PCR Panel with 157 unique assays (Applied Biosystems®, Foster City, CA) by Yanaihara et al. (*Cancer Cell*, 13[1]:48-57, 2008) were procured from supplemental material provided online with the publication.

## Appendix 2

### *Analyses of microRNA expression in data for lung adenocarcinoma (AC) and squamous cell carcinoma (SCC) in the Cancer Genome Atlas (TCGA) project*

Sub-project-specific level 1 clinical and level 3 non-normalized microRNA isoform quantification data for the LUAD (for AC) and LUSC (for SCC) TCGA sub-projects were obtained for the standardization run of 22 February 2013 from the dashboard web-site of the Broad Institute Genome Data Analysis Center (GDAC) Firehose.

MicroRNA quantification in total RNA from fresh-frozen tissues, including primary tumor tissues from 334 AC and 300 SCC cases (Table S2), and tumor-adjacent normal tissues from 45 of the AC and 29 of the SCC cases, have been performed in the TCGA project using the Genome Analyzer or HiSeq™ RNA sequencing platforms (Illumina®, San Diego, CA). The former platform was used for primary tumor tissues of 63 of the AC and 136 of the SCC cases, and the latter for the remaining tissues whose numbers are mentioned earlier. Similarity of microRNA quantification data generated by the two platforms was confirmed by comparing data for 36 RNA samples that had been quantified by both platforms for the HNSC TCGA sub-project; this analysis is not elaborated here.

Separately for AC and SCC, and for each of the two microRNA quantification platforms, microRNA expression data was processed using R (version 2.15.1, in Mac OS X 10.6.8) to first sum 'read\_count' values for data rows with identical values for the 'miRNA\_ID' and 'miRNA\_region' variables. The absolute microRNA count data-sets that were thus generated were then filtered to remove samples for which either clinical data was unavailable or the RNA was not from primary tumor or adjacent normal tissue were, and then optionally normalized to count-per-million (cpm) values with the trended mean of M-values (TMM) method of the edgeR Bioconductor package (version 3.0.8; Robinson et al., *Bioinformatics*, 26[1]:139-40, 2010). The absolute or normalized count data-sets were then merged to generate data-sets with expression measures for 2,424 variables (small RNAs) and 708 samples.

Normalized count data, filtered to only retain the 979 variables with an associated miRBase mature microRNA identification (MIMAT ID), and with a value available for all 634 primary tumor samples, was analyzed for receiver operating characteristics (ROC) with the caTools package (version 1.13) in R.

Absolute count data was analyzed with the edgeR package for differential expression using Fisher's exact test, with false discovery rate controlled by the Benjamini-Hochberg method at 5%. Values for only the 578 variables, quantified for all 708 samples and with cpm >4 in >28 of them, were considered for differential expression analysis. The parameters 'rowsum.filter' and 'prior.df' for estimating common and tag-wise dispersions in the analysis were respectively set to 145 and 0.2.

Candidate AC-SCC histotypic microRNAs, listed in Table S3, were identified as differentially expressed variables annotated as a mature microRNA with both absolute  $\log_2(\text{fold-change})$  and mean cpm values >1 as per edgeR, and with a >0.8 area under curve in the ROC analysis.

## Figure S1

Correlation between microRNA quantifications by reverse transcription (RT)-PCR and microarray assays. Measurements obtained by RT-PCR as quantification cycle ( $C_q$ ) values of *miR-21*, *-205* and *-375* in RNA of 53 resected lung cancers are plotted against their  $\log_2$ -transformed microarray signals. The Pearson correlation coefficient ( $r$ ) with 95% confidence interval and linear regression lines generated with the least squares fitting technique for each microRNA are also shown.

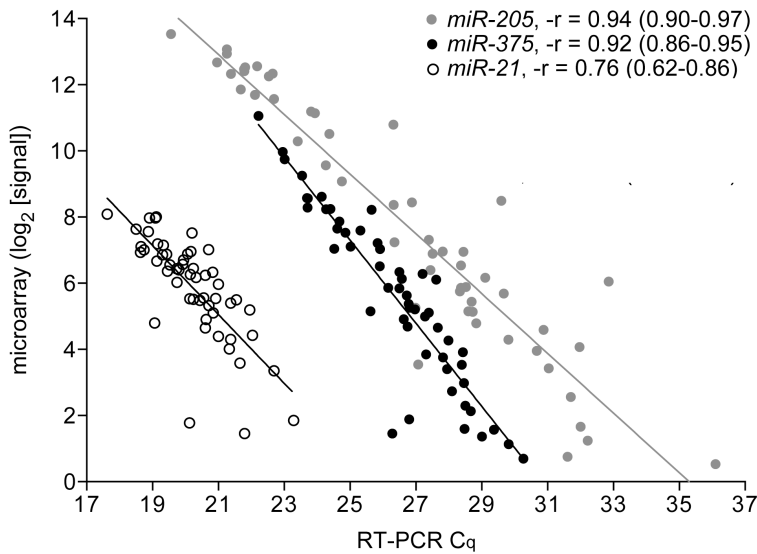

**Figure S2**

Standard curves for calculation of molarity in reverse transcription (RT)-PCR assays. RT-PCR assays for *miR-21-5p*, *miR-205-5p*, *miR-375-3p*, or *RNU6-2 (U6B)* were performed on samples with  $10^{2-9}$  molecules of synthetic, 5' phosphorylated small RNAs with human *miR-21-5p*, *miR-205-5p*, *miR-375-3p*, or *RNU6-2 (U6B)* sequences. Quantification cycle ( $C_q$ ) values obtained in the assays are plotted against the number of molecules of the synthetic standards present in the RT reactions. Linear regression lines (least squares fitting technique) and their 95% confidence bands, and slopes ( $m$ ) and Y intercepts ( $b$ ) with 95% confidence intervals are also depicted.

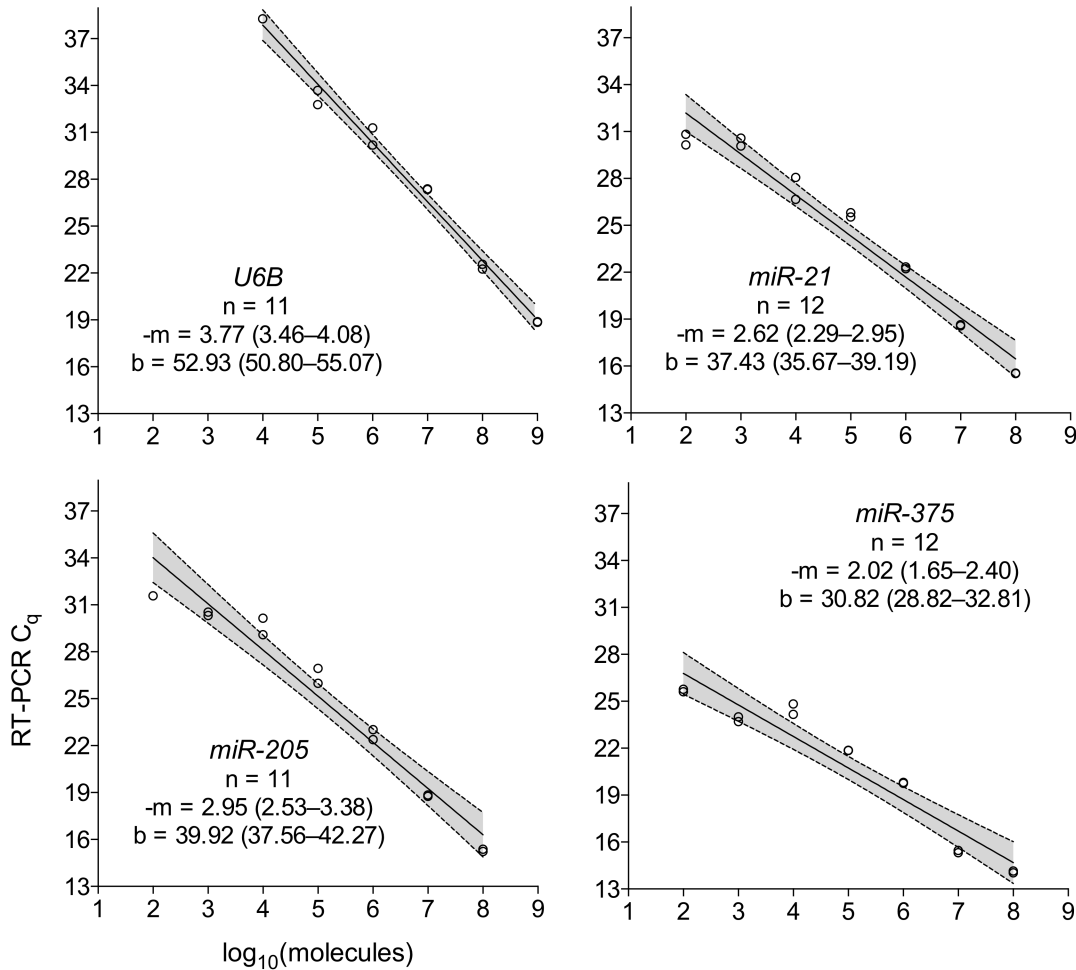

**Figure S3**

Receiver operating characteristic (ROC) analyses for lung cancer histology and *miR-21* and *miR-205* measurements in external data-sets. MicroRNA expression data from the studies of Lu et al., Patnaik et al., Yanaihara et al., and Yu et al. were obtained as described in Appendix 1. Sample-sizes for the data ( $n$ ), ROC curves generated using measurements of *miR-21* (solid gray), *miR-205* (blue), or *miR-205* relative to *miR-21* (*miR-205* – *miR-21*; green), the areas under the curves and their 95% confidence intervals, and the lines of identity (dotted gray) are shown.

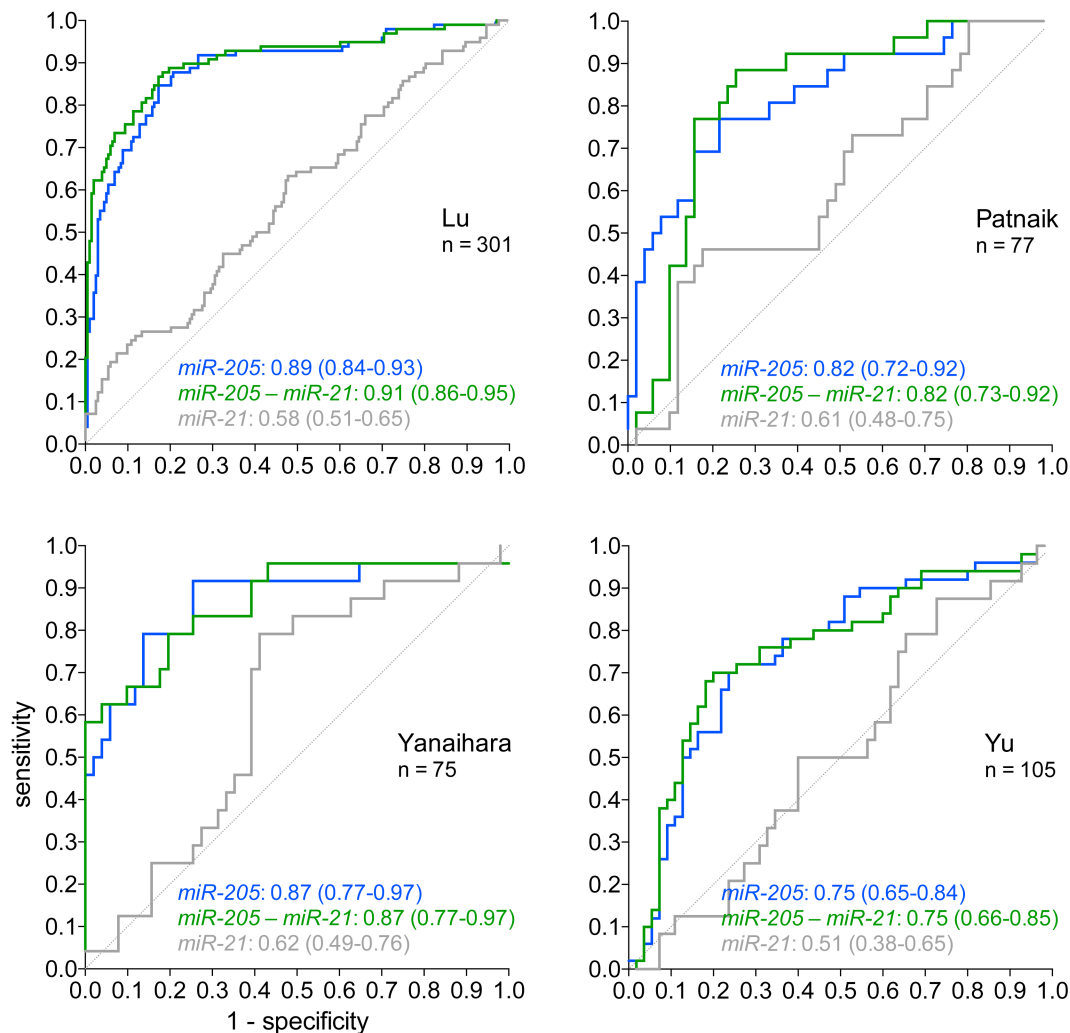

### Figure S4

Correlation between Lebanony scores and  $miR-205 \Delta C_q^{U6B}$  values of resected lung cancers. The scatterplot shows Lebanony scores and  $miR-205 \Delta C_q^{U6B}$  values determined for 77 resected lung cancer tumors in RT-PCR assays (Table S8). Linear regression lines (least squares fitting technique) and their 95% confidence bands, and the Pearson correlation coefficient ( $r$ ), slope ( $m$ ) and Y intercept ( $b$ ) values with 95% confidence intervals are also depicted.

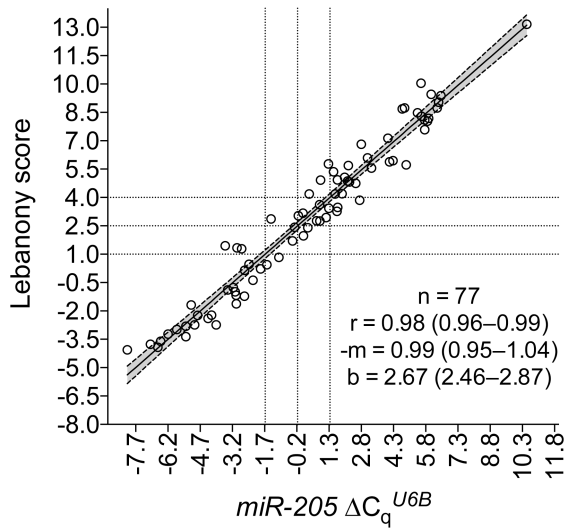



**Figure S5**

Expression of *miR-375* in resected lung squamous cell carcinoma (SCC) and adenocarcinoma (AC) tissues. Reverse transcription (RT)-PCR assays were used to determine the level of *miR-375* relative to that of the *U6B* small RNA ( $miR-375 \Delta C_q^{U6B}$ ) or *miR-205* ( $miR-375 \Delta C_q^{miR-205}$ ) in 5 ng of RNA from 49 AC and 28 SCC cases. For each type of measurement, panel A shows dot-plots of individual values along with histology-specific group means and standard deviations; panel B shows receiver operating characteristic curves, along with values of area under curve (AUC) and its 95% confidence interval, using the *miR-375* measurements to discriminate SCC from AC; and, panel C shows the measurement values in terms of molarity along with linear regression lines and their slopes ( $m$ ) and  $Y$  intercepts ( $b$ ) determined by the least squares fitting technique.

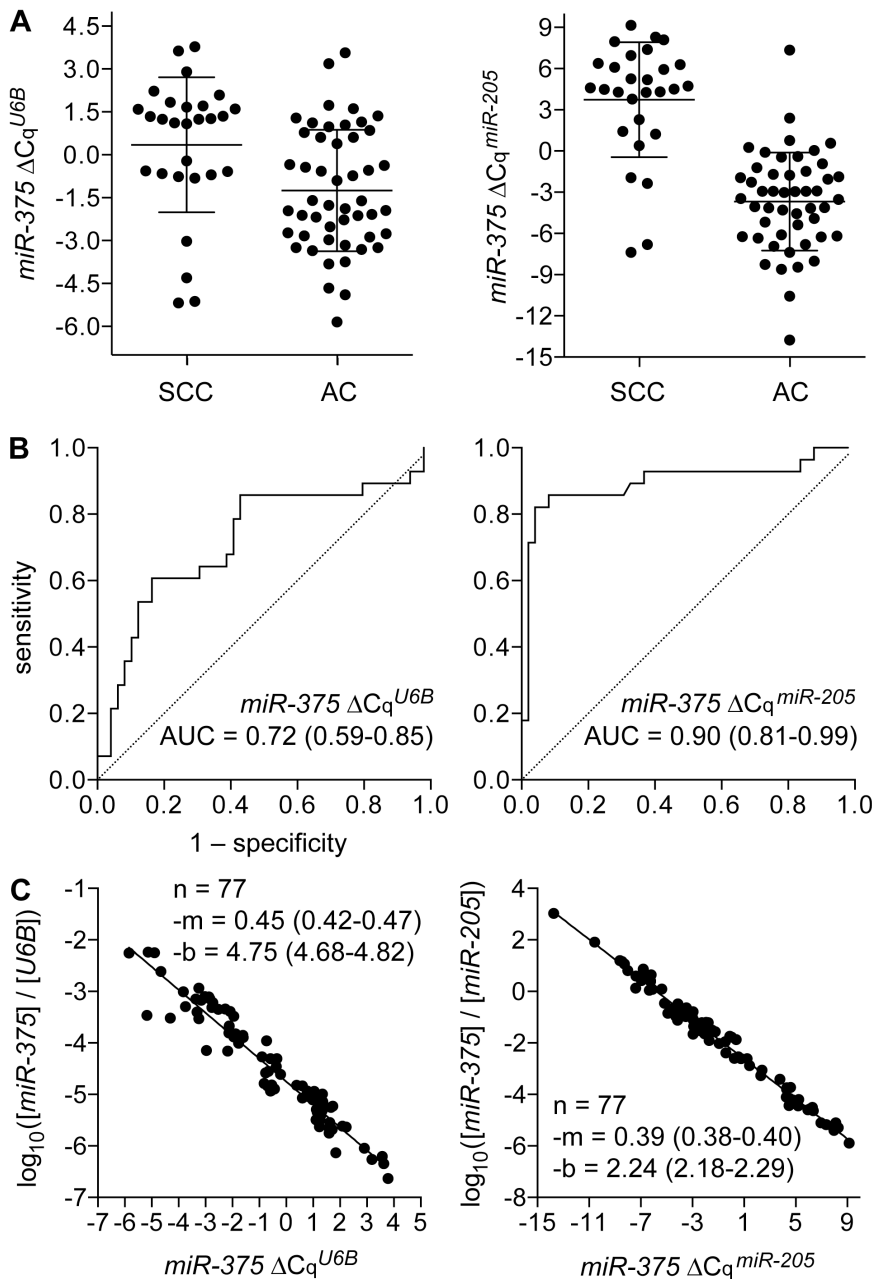

**Table S1**

Differential expression of microRNAs in lung squamous cell carcinoma (SCC) and adenocarcinoma (AC) in two external data-sets<sup>a</sup>

| <i>MicroRNA</i>         | <i>Mean expression</i> <sup>b</sup> | <i>Fold-change</i> <sup>c</sup> | <i>P</i> <sup>d</sup> | <i>AUC</i> <sup>e</sup> |
|-------------------------|-------------------------------------|---------------------------------|-----------------------|-------------------------|
| <b>Lu (n = 301)</b>     |                                     |                                 |                       |                         |
| <i>miR-205</i>          | 12.7                                | 1.7                             | 1.3E-22               | 0.887                   |
| <i>miR-944</i>          | 7.5                                 | 1.5                             | 1.4E-20               | 0.795                   |
| <i>miR-326</i>          | 12.2                                | -0.7                            | 2.1E-14               | 0.784                   |
| <i>miR-375</i>          | 13.3                                | -0.9                            | 2.6E-13               | 0.802                   |
| <i>miR-29a</i>          | 13.7                                | -0.5                            | 1.6E-11               | 0.750                   |
| <i>miR-29b-2*</i>       | 9.0                                 | -0.9                            | 3.8E-11               | 0.754                   |
| <i>miR-92b</i>          | 11.9                                | -0.7                            | 6.6E-11               | 0.730                   |
| <i>miR-34a</i>          | 13.1                                | -0.5                            | 9.0E-11               | 0.722                   |
| <i>miR-29b-1*</i>       | 10.1                                | -0.9                            | 1.1E-10               | 0.734                   |
| <i>miR-768-5p</i>       | 13.1                                | -0.4                            | 2.4E-10               | 0.714                   |
| <b>Patnaik (n = 77)</b> |                                     |                                 |                       |                         |
| <i>miR-205</i>          | 7.5                                 | 1.8                             | 4.9E-05               | 0.824                   |
| <i>miR-375</i>          | 6.6                                 | -0.7                            | 9.5E-03               | 0.823                   |

<sup>a</sup>Differential expression of microRNAs between SCC and AC, in the two data-sets described in Appendix 1 that have measurements for *miR-375*, was analyzed using the limma Bioconductor package (version 3.12.3) in R (version 2.15.1) on Mac OS X operating system (version 10.6.8).

<sup>b</sup>Average of microarray signal values of all samples, in log<sub>2</sub> units

<sup>c</sup>Ratio of average of microarray signal values of all SCC samples to that of AC samples, in log<sub>2</sub> units

<sup>d</sup>P value, based on moderated t statistics and adjusted by the Benjamini-Hochberg method for a ≤5% false discovery rate, was calculated using the limma package.

<sup>e</sup>Area under receiver operating characteristic curve was calculated using the caTools package (version 1.13) in R.

**Table S2**

Characteristics of lung adenocarcinoma (AC) and squamous cell carcinoma (SCC) cases in data<sup>a</sup> obtained from the Cancer Genome Atlas (TCGA) project

| <i>Characteristic</i> | <i>Value<sup>c</sup></i> | <i>AC (n = 334)</i>   | <i>SCC (n=300)</i>    | <i>P<sup>b</sup></i> |
|-----------------------|--------------------------|-----------------------|-----------------------|----------------------|
| Age in years          | Mean (range; SD)         | 65.8 (38.5-86.5; 9.9) | 68.3 (39.3-85.0; 8.6) | <0.01                |
| Gender                | Male                     | 150                   | 222                   | <0.01                |
|                       | Female                   | 184                   | 78                    |                      |
| Ethnicity             | Caucasian                | 252                   | 207                   | 0.60                 |
|                       | African-American         | 21                    | 13                    |                      |
|                       | Asian                    | 4                     | 5                     |                      |
| Smoking status        | Current                  | 76                    | 70                    | <0.01                |
|                       | Past                     | 196                   | 213                   |                      |
|                       | Never                    | 49                    | 11                    |                      |
| Vital status          | Living                   | 249                   | 191                   | <0.01                |
|                       | Deceased                 | 85                    | 109                   |                      |
| Tumor stage           | I                        | 175                   | 153                   | <0.01                |
|                       | II                       | 72                    | 83                    |                      |
|                       | III                      | 63                    | 58                    |                      |
|                       | IV                       | 18                    | 3                     |                      |

<sup>a</sup>Cases for which microRNA expression was analyzed (Appendix 2)

<sup>b</sup>Comparing the AC and SCC groups as per the standard two-tailed t test in case of age and Fisher's exact test in case of the other characteristics

<sup>c</sup>Characteristic values were unavailable for some of the cases

**Table S3**

Histotypic microRNAs to distinguish lung squamous cell carcinoma (SCC) from adenocarcinoma (AC) identified in data obtained from the Cancer Genome Atlas (TCGA) project<sup>a</sup>

|                 | <i>MIMAT ID</i> <sup>c</sup> | <i>AUC</i> <sup>d</sup> | <i>Differential expression analysis</i> <sup>b</sup> |                        |            |
|-----------------|------------------------------|-------------------------|------------------------------------------------------|------------------------|------------|
|                 |                              |                         | <i>Fold-change</i>                                   | <i>Mean expression</i> | <i>FDR</i> |
| <i>miR-326</i>  | 0000756                      | 0.81                    | -1.8                                                 | 6.8                    | 3E-75      |
| <i>miR-19a</i>  | 0000073                      | 0.82                    | 1.1                                                  | 4.6                    | 1E-29      |
| <i>miR-33a</i>  | 0000091                      | 0.84                    | 1.1                                                  | 5.4                    | 6E-41      |
| <i>miR-203</i>  | 0000264                      | 0.86                    | 2.2                                                  | 14.3                   | 1E-84      |
| <i>miR-196b</i> | 0001080                      | 0.88                    | 1.3                                                  | 8.3                    | 8E-25      |
| <i>miR-375</i>  | 0000728                      | 0.88                    | -2.6                                                 | 14.6                   | 3E-43      |
| <i>miR-708</i>  | 0004926                      | 0.89                    | 1.5                                                  | 6.4                    | 2E-72      |
| <i>miR-708*</i> | 0004927                      | 0.91                    | 1.6                                                  | 7.2                    | 3E-81      |
| <i>miR-149</i>  | 0000450                      | 0.93                    | 2.3                                                  | 6.8                    | 4E-92      |
| <i>miR-205*</i> | 0009197                      | 0.95                    | 3.8                                                  | 1.5                    | 6E-138     |
| <i>miR-944</i>  | 0004987                      | 0.95                    | 4.4                                                  | 6.3                    | 4E-196     |
| <i>miR-205</i>  | 0000266                      | 0.96                    | 4.0                                                  | 12.5                   | 7E-123     |

<sup>a</sup>Data analyses are described in Appendix 2.

<sup>b</sup>Performed using the edgeR Bioconductor package in R; log<sub>2</sub>-transformed fold-changes between average count-per-million (cpm) microRNA values for SCC and AC, log<sub>2</sub>-transformed averages of cpm across all samples, and false discovery rates (FDR) are noted

<sup>c</sup>Mature microRNA identification number in the miRBase microRNA repository

<sup>d</sup>Area under curve in receiver operating characteristic analysis

**Table S4**

Characteristics of the cohort of 190 non-small cell lung cancer cases that was evaluated for accuracy of subtyping the cancer by histopathologic examination of biopsies

| <i>Attribute</i>                  | <i>Value</i>                    | <i>Number</i> |
|-----------------------------------|---------------------------------|---------------|
| Gender                            | Male                            | 76 (40.0%)    |
|                                   | Female                          | 114 (60.0%)   |
| Ethnicity                         | African-American                | 9 (4.7%)      |
|                                   | Caucasian                       | 181 (95.3%)   |
| Smoking status at time of surgery | Current smoker                  | 74 (39.0%)    |
|                                   | Past smoker                     | 91 (47.9%)    |
|                                   | Never smoked                    | 25 (13.2%)    |
| Neoadjuvant cancer therapy        | Only chemotherapy               | 52 (27.4%)    |
|                                   | Only radiation                  | 0 (0%)        |
|                                   | Both chemotherapy and radiation | 12 (6.3%)     |
| Type of biopsy                    | Core biopsy                     | 113 (59.5%)   |
|                                   | Fine needle aspiration          | 77 (40.5%)    |
| Means of biopsy                   | Bronchoscopy                    | 133 (70.0%)   |
|                                   | Under computer tomography       | 57 (30.0%)    |
| Institution performing biopsy     | Roswell Park Cancer Institute   | 67 (35.3%)    |
|                                   | Other                           | 123 (64.7%)   |
| Immunohistochemical staining      | Biopsy examined                 | 99 (52.1%)    |
|                                   | Resectate examined              | 68 (35.8%)    |

**Table S5**Characteristics of resected lung cancer samples assayed by reverse transcription (RT)-PCR<sup>a</sup>

| Sample | Age <sup>b</sup> (years) | Gender <sup>c</sup> | Smoking history <sup>d</sup> | Pathologic stage | Resected cancer <sup>e</sup>                                             |                 |                   | Year of resection | RNA extraction   |      |
|--------|--------------------------|---------------------|------------------------------|------------------|--------------------------------------------------------------------------|-----------------|-------------------|-------------------|------------------|------|
|        |                          |                     |                              |                  | Histology                                                                | Present protein | Absent protein    |                   | Kit <sup>f</sup> | Year |
| 1      | 70                       | M                   | N                            | 1B               | BAC; poorly differentiated                                               |                 |                   | 2000              | A                | 2010 |
| 2      | 56                       | M                   | P                            | 1A               | BAC                                                                      | CK7             |                   | 2000              | A                | 2010 |
| 3      | 73                       | F                   | P                            | 1B               | SCC, large cell non-keratinizing type                                    |                 |                   | 2000              | A                | 2010 |
| 4      | 82                       | M                   | P                            | 1A               | BAC                                                                      |                 |                   | 2000              | A                | 2010 |
| 5      | 82                       | M                   | C                            | 1A               | AC, with focal and minor SCC component                                   |                 |                   | 2000              | R                | 2008 |
| 6      | 72                       | F                   | N                            | 1B               | AC; moderately differentiated                                            |                 |                   | 2002              | A                | 2010 |
| 7      | 70                       | F                   | C                            | 1A               | BAC; poorly differentiated                                               |                 |                   | 2002              | R                | 2008 |
| 8      | 46                       | M                   | C                            | 1B               | SCC; moderately differentiated                                           |                 |                   | 2003              | A                | 2010 |
| 9      | 69                       | M                   | C                            | 1A               | BAC; poorly differentiated                                               |                 |                   | 2003              | A                | 2010 |
| 10     | 74                       | M                   | P                            | 1A               | SCC; moderately differentiated                                           |                 |                   | 2004              | A                | 2010 |
| 11     | 59                       | F                   | N                            | 1A               | SCC; poorly differentiated                                               |                 |                   | 2007              | A                | 2010 |
| 12     | 80                       | M                   | P                            | 1A               | Mucin-producing AC; moderately differentiated                            | CK7, TTF-1      |                   | 2006              | A                | 2010 |
| 13     | 71                       | M                   | C                            | 1A               | AC; moderately differentiated                                            |                 |                   | 2007              | R                | 2008 |
| 14     | 67                       | F                   | P                            | 1A               | AC; poorly differentiated                                                |                 |                   | 2007              | A                | 2010 |
| 15     | 73                       | F                   | P                            | 1A               | SCC; moderately differentiated                                           |                 |                   | 2006              | R                | 2008 |
| 16     | 65                       | M                   | P                            | 1A               | AC; poorly differentiated                                                | CK7, TTF-1      |                   | 2007              | R                | 2008 |
| 17     | 64                       | M                   | P                            | 1A               | SCC; poorly differentiated                                               |                 |                   | 2007              | A                | 2010 |
| 18     | 81                       | M                   | P                            | 1A               | SCC; poorly differentiated                                               |                 |                   | 2007              | A                | 2010 |
| 19     | 68                       | M                   | P                            | 1A               | BAC, mixed mucinous and non-mucinous; moderately differentiated          |                 |                   | 2007              | A                | 2010 |
| 20     | 51                       | F                   | C                            | 1A               | AC; moderately differentiated                                            |                 |                   | 2007              | A                | 2010 |
| 21     | 68                       | M                   | P                            | 1A               | AC, with focal and minor SCC component; poorly differentiated            |                 |                   | 2002              | A                | 2010 |
| 22     | 75                       | M                   | P                            | 1B               | SCC; poorly differentiated                                               |                 |                   | 2005              | A                | 2010 |
| 23     | 67                       | M                   | P                            | 1B               | AC; poorly differentiated                                                | CK7             | TTF-1             | 2005              | A                | 2010 |
| 24     | 72                       | M                   | C                            | 1A               | AC; moderately differentiated                                            | CK7, TTF-1      |                   | 2006              | A                | 2010 |
| 25     | 77                       | M                   | C                            | 1B               | AC; moderately differentiated                                            |                 |                   | 2007              | A                | 2010 |
| 26     | 81                       | M                   | P                            | 1B               | SCC; poorly differentiated                                               |                 |                   | 2006              | A                | 2010 |
| 27     | 57                       | F                   | C                            | 1B               | SCC; poorly differentiated                                               | CK, P63         | Mucin             | 2006              | A                | 2010 |
| 28     | 52                       | M                   | C                            | 1A               | AC, with focal and minor neuroendocrine component; poorly differentiated | CK7, TTF-1      |                   | 2006              | R                | 2008 |
| 29     | 84                       | F                   | P                            | 1A               | AC; moderately differentiated                                            |                 |                   | 2006              | R                | 2008 |
| 30     | 78                       | F                   | C                            | 1A               | SCC; moderately differentiated                                           |                 | CK7, mucin, TTF-1 | 2007              | A                | 2010 |
| 31     | 56                       | M                   | C                            | 1B               | BAC; well differentiated                                                 |                 |                   | 2008              | A                | 2010 |
| 32     | 53                       | M                   | C                            | 1A               | AC; poorly differentiated                                                |                 |                   | 2007              | A                | 2010 |
| 33     | 50                       | F                   | C                            | 1B               | AC; poorly differentiated                                                |                 |                   | 2007              | A                | 2010 |
| 34     | 51                       | F                   | C                            | 1A               | BAC; moderately differentiated                                           | CK7, TTF-1      |                   | 2007              | A                | 2010 |

|    |    |   |   |    |                                                                     |                       |            |      |   |      |
|----|----|---|---|----|---------------------------------------------------------------------|-----------------------|------------|------|---|------|
| 35 | 57 | F | C | 1A | AC; poorly differentiated                                           | CK7, mucin,<br>TTF-1  |            | 2007 | R | 2008 |
| 36 | 67 | M | P | 1B | AC; poorly differentiated                                           |                       |            | 2007 | A | 2010 |
| 37 | 69 | F | P | 1B | BAC; poorly differentiated                                          | TTF-1                 |            | 2007 | A | 2010 |
| 38 | 63 | M | C | 1A | SCC, large cell non-keratinizing type;<br>moderately differentiated |                       |            | 2008 | A | 2010 |
| 39 | 71 | M | C | 1B | SCC; poorly differentiated                                          | P63                   | Mucin      | 2007 | A | 2010 |
| 40 | 70 | F | P | 1A | AC; poorly differentiated                                           | CK7, TTF-1            |            | 2007 | A | 2010 |
| 41 | 70 | F | N | 1A | AC; poorly differentiated                                           | CK7, HMW<br>CK, mucin | P63, TTF-1 | 2007 | A | 2010 |
| 42 | 57 | M | C | 1A | AC with mixed subtypes; moderately<br>differentiated                |                       |            | 2008 | A | 2010 |
| 43 | 76 | F | P | 1A | Mucin-producing AC; moderately<br>differentiated                    |                       |            | 2005 | R | 2008 |
| 44 | 75 | M | P | 1A | SCC; moderately differentiated                                      |                       |            | 2005 | R | 2008 |
| 45 | 79 | F | P | 1B | AC; moderately differentiated                                       | CK7                   | TTF-1      | 2006 | R | 2008 |
| 46 | 78 | F | C | 1A | SCC; poorly differentiated                                          |                       |            | 2007 | A | 2010 |
| 47 | 60 | M | P | 1B | AC; moderately differentiated                                       |                       |            | 2007 | R | 2008 |
| 48 | 77 | M | P | 1A | SCC; poorly differentiated                                          |                       |            | 2007 | A | 2010 |
| 49 | 76 | F | P | 1A | SCC; moderately differentiated                                      |                       |            | 2003 | A | 2010 |
| 50 | 56 | M | C | 1B | BAC; well differentiated                                            |                       |            | 2008 | R | 2008 |
| 51 | 77 | F | N | 1B | AC; moderately differentiated                                       | CK7, TTF-1            |            | 2007 | A | 2010 |
| 52 | 70 | M | P | 1B | SCC; poorly differentiated                                          |                       |            | 2007 | R | 2008 |
| 53 | 66 | F | P | 1A | AC; moderately differentiated                                       | CK7, TTF-1            |            | 2007 | A | 2010 |
| 54 | 76 | M | P | 1B | BAC; moderately differentiated                                      |                       |            | 2008 | A | 2010 |
| 55 | 62 | F | C | 1B | SCC; moderately differentiated                                      |                       |            | 2007 | R | 2008 |
| 56 | 65 | F | P | 1A | AC; poorly differentiated                                           | CK7, TTF-1            | P63        | 2008 | A | 2010 |
| 57 | 63 | F | P | 1A | SCC; moderately differentiated                                      |                       |            | 2006 | A | 2010 |
| 58 | 70 | M | P | 1B | AC; poorly differentiated                                           | CK7                   |            | 2007 | R | 2008 |
| 59 | 39 | M | C | 1B | SCC; poorly differentiated                                          |                       |            | 2007 | R | 2008 |
| 60 | 71 | F | N | 1B | BAC; well differentiated                                            |                       |            | 2007 | A | 2010 |
| 61 | 85 | F | P | 1A | SCC                                                                 |                       |            | 2006 | R | 2008 |
| 62 | 70 | F | P | 1A | SCC; moderately differentiated                                      |                       |            | 2007 | A | 2010 |
| 63 | 91 | M | N | 1B | BAC                                                                 |                       |            | 2005 | A | 2010 |
| 64 | 47 | F | P | 1A | AC; moderately differentiated                                       |                       |            | 2007 | A | 2010 |
| 65 | 70 | M | C | 1A | AC; moderately differentiated                                       |                       |            | 2005 | R | 2008 |
| 66 | 75 | F | N | 1A | SCC, keratinizing type; moderately<br>differentiated                |                       |            | 2007 | A | 2010 |
| 67 | 68 | F | P | 1B | SCC, with focal and minor AC component;<br>poorly differentiated    |                       |            | 2006 | A | 2010 |
| 68 | 58 | F | P | 1A | AC; poorly differentiated                                           |                       |            | 2007 | A | 2010 |
| 70 | 53 | M | P | 1B | BAC; moderately differentiated                                      |                       |            | 2007 | A | 2010 |
| 71 | 82 | M | P | 1B | SCC; poorly differentiated                                          |                       |            | 2007 | R | 2008 |
| 74 | 51 | F | C | 1B | AC; poorly differentiated                                           |                       |            | 2007 | A | 2010 |
| 75 | 62 | F | C | 1A | BAC; moderately differentiated                                      | CK7                   |            | 2008 | A | 2010 |
| 76 | 51 | M | P | 1B | AC; poorly differentiated                                           | CK7, TTF-1            |            | 2007 | A | 2010 |
| 77 | 77 | M | C | 1B | BAC, mixed mucinous and non-mucinous;<br>well differentiated        | CK7                   | TTF-1      | 2007 | A | 2010 |
| 78 | 78 | F | P | 1B | BAC; well differentiated                                            |                       |            | 2008 | R | 2008 |
| 79 | 74 | M | C | 1B | SCC; moderately differentiated                                      |                       |            | 2007 | A | 2010 |
| 80 | 58 | M | C | 1A | SCC; poorly differentiated                                          |                       |            | 2008 | A | 2010 |

<sup>a</sup>All cases except those with samples named 48 (Asian), and 3, 19, 26 and 56 (African American) are of non-Hispanic white ethnicity. Only cases with samples named 38 and 46 received a neoadjuvant treatment (chemotherapy in both cases).

<sup>b</sup>At the time of resective surgery for the lung cancer

<sup>c</sup>F, female; M, male

<sup>d</sup>At the time of resective surgery for the lung cancer; C, current smoker; N, never smoked; P, past smoker

<sup>e</sup>AC, adenocarcinoma; BAC, bronchioloalveolar carcinoma (an AC sub-type); SCC, squamous cell carcinoma. Histology was characterized by morphological examination of tissue sections and, for some samples, by the presence or absence of protein markers as assessed by periodic acid-Schiff (mucin) or immunohistochemical (others) staining. CK, cytokeratins as recognized by the AE1/AE3 mouse antibody mix; CK7, etc., cytokeratin 7, etc.; HMW CK, high molecular weight CK1/CK5/CK10/CK14 polypeptides as recognized by the 34bE12 mouse antibody; TTF-1, thyroid transcription factor-1

<sup>f</sup>A, Ambion® RecoverAll™ Total Nucleic Acid Isolation; R, Roche® High Pure™ miRNA Isolation



**Table S6**

Characteristics of biopsied lung cancer samples assayed by reverse transcription (RT)-PCR<sup>a</sup>

| <i>Sample</i> | <i>Age<sup>b</sup><br/>(years)</i> | <i>Gender<sup>c</sup></i> | <i>Smoking<br/>history<sup>d</sup></i> | <i>Year of<br/>biopsy</i> | <i>Year of<br/>resection</i> | <i>Year of microdissection<br/>and RNA isolation</i> |
|---------------|------------------------------------|---------------------------|----------------------------------------|---------------------------|------------------------------|------------------------------------------------------|
| A             | 76                                 | M                         | P                                      | 2009                      | 2009                         | 2012                                                 |
| B             | 63                                 | F                         | N                                      | 2008                      | 2009                         | 2012                                                 |
| C             | 69                                 | F                         | N                                      | 2009                      | 2010                         | 2012                                                 |
| D             | 59                                 | F                         | C                                      | 2006                      | 2007                         | 2011                                                 |
| E             | 55                                 | M                         | P                                      | 2006                      | 2006                         | 2011                                                 |
| F             | 56                                 | F                         | N                                      | 2008                      | 2008                         | 2011                                                 |
| G             | 74                                 | M                         | P                                      | 2009                      | 2009                         | 2012                                                 |
| H             | 65                                 | M                         | P                                      | 2009                      | 2009                         | 2012                                                 |
| I             | 66                                 | M                         | P                                      | 1996                      | 1996                         | 2011                                                 |
| J             | 48                                 | M                         | P                                      | 1996                      | 1996                         | 2011                                                 |
| K             | 63                                 | M                         | P                                      | 1996                      | 1996                         | 2011                                                 |
| L             | 65                                 | F                         | C                                      | 1996                      | 1996                         | 2011                                                 |
| M             | 45                                 | M                         | P                                      | 1996                      | 1996                         | 2011                                                 |
| N             | 71                                 | F                         | P                                      | 1999                      | 1999                         | 2011                                                 |
| O             | 46                                 | F                         | C                                      | 1999                      | 1999                         | 2011                                                 |
| P             | 48                                 | F                         | C                                      | 2000                      | 2000                         | 2011                                                 |
| Q             | 62                                 | M                         | P                                      | 2005                      | 2005                         | 2011                                                 |
| R             | 66                                 | M                         | N                                      | 2004                      | 2004                         | 2011                                                 |
| S             | 60                                 | F                         | P                                      | 2007                      | 2007                         | 2011                                                 |
| T             | 46                                 | M                         | C                                      | 2007                      | 2007                         | 2011                                                 |
| U             | 64                                 | F                         | P                                      | 2007                      | 2007                         | 2011                                                 |
| V             | 75                                 | F                         | N                                      | 2009                      | 2009                         | 2012                                                 |
| W             | 76                                 | F                         | P                                      | 2012                      | 2012                         | 2012                                                 |
| X             | 66                                 | M                         | P                                      | 2008                      | 2008                         | 2012                                                 |
| Y             | 58                                 | F                         | P                                      | 2008                      | 2008                         | 2012                                                 |

<sup>a</sup>All cases except that with sample named D (American Indian) are of non-Hispanic white ethnicity. Only cases with samples named D, J, X and Y received a neoadjuvant treatment (all chemotherapy).

<sup>b</sup>At the time of resective surgery for the lung cancer

<sup>c</sup>F, female; M, male

<sup>d</sup>At the time of resective surgery for the lung cancer; C, current smoker; N, never smoked; P, past smoker

**Table S7**

Raw and calibrated quantification cycle ( $C_q$ ) values obtained in reverse transcription (RT)-PCR assays

| Experiment <sup>a</sup>               |          |                     | $C_q$ (triplicate PCR) |                    |        |        |                                   | Calibration factor | Calibrated <sup>d</sup><br>$C_q$ |
|---------------------------------------|----------|---------------------|------------------------|--------------------|--------|--------|-----------------------------------|--------------------|----------------------------------|
| ID                                    | Date     | Sample <sup>b</sup> | Assay                  | 1                  | 2      | 3      | Mean <sup>c</sup><br>(raw $C_q$ ) |                    |                                  |
| <b>For generating standard curves</b> |          |                     |                        |                    |        |        |                                   |                    |                                  |
| E441                                  | 12/27/12 | miR-375 std., 10e2  | miR-375                | 25.723             | 25.793 | 25.777 | 25.764                            |                    |                                  |
| E441                                  | 12/27/12 | miR-375 std., 10e2  | miR-375                | 25.587             | 25.674 | 25.562 | 25.608                            |                    |                                  |
| E441                                  | 12/27/12 | miR-375 std., 10e3  | miR-375                | 23.812             | 23.743 | 23.542 | 23.699                            |                    |                                  |
| E441                                  | 12/27/12 | miR-375 std., 10e3  | miR-375                | 23.949             | 24.092 | 23.990 | 24.010                            |                    |                                  |
| E441                                  | 12/27/12 | miR-375 std., 10e4  | miR-375                | 24.858             | 24.850 | 24.785 | 24.831                            |                    |                                  |
| E441                                  | 12/27/12 | miR-375 std., 10e4  | miR-375                | 24.377             | 23.796 | 24.324 | 24.166                            |                    |                                  |
| E441                                  | 12/27/12 | miR-375 std., 10e5  | miR-375                | 22.016             | 21.710 | 21.829 | 21.852                            |                    |                                  |
| E441                                  | 12/27/12 | miR-375 std., 10e5  | miR-375                | 21.832             | 21.830 | 21.932 | 21.864                            |                    |                                  |
| E441                                  | 12/27/12 | miR-375 std., 10e6  | miR-375                | 19.712             | 19.909 | 19.806 | 19.809                            |                    |                                  |
| E441                                  | 12/27/12 | miR-375 std., 10e6  | miR-375                | 19.807             | 19.763 | 19.708 | 19.759                            |                    |                                  |
| E441                                  | 12/27/12 | miR-375 std., 10e7  | miR-375                | 15.386             | 15.322 | 15.242 | 15.316                            |                    |                                  |
| E441                                  | 12/27/12 | miR-375 std., 10e7  | miR-375                | 15.395             | 15.379 | 15.627 | 15.467                            |                    |                                  |
| E441                                  | 12/27/12 | miR-375 std., 10e8  | miR-375                | 14.353             | 14.028 | 14.056 | 14.146                            |                    |                                  |
| E441                                  | 12/27/12 | miR-375 std., 10e8  | miR-375                | 13.829             | 14.189 | 14.062 | 14.027                            |                    |                                  |
| E441                                  | 12/27/12 | none (water)        | miR-375                | undet <sup>e</sup> | undet  | 36.453 | undet                             |                    |                                  |
| E433                                  | 11/7/12  | U6B std., 10e2      | U6B                    | undet              | undet  | undet  | undet                             |                    |                                  |
| E433                                  | 11/7/12  | U6B std., 10e2      | U6B                    | undet              | 36.948 | undet  | undet                             |                    |                                  |
| E433                                  | 11/7/12  | U6B std., 10e3      | U6B                    | undet              | undet  | undet  | undet                             |                    |                                  |
| E433                                  | 11/7/12  | U6B std., 10e3      | U6B                    | undet              | undet  | 37.350 | undet                             |                    |                                  |
| E433                                  | 11/7/12  | U6B std., 10e4      | U6B                    | undet              | undet  | undet  | 1.000                             |                    |                                  |
| E433                                  | 11/7/12  | U6B std., 10e4      | U6B                    | 37.180             | 39.368 | undet  | 38.274                            |                    |                                  |
| E433                                  | 11/7/12  | U6B std., 10e5      | U6B                    | 33.093             | 32.675 | 32.561 | 32.776                            |                    |                                  |
| E433                                  | 11/7/12  | U6B std., 10e5      | U6B                    | 33.359             | 34.677 | 33.009 | 33.682                            |                    |                                  |
| E433                                  | 11/7/12  | U6B std., 10e6      | U6B                    | 30.350             | 30.103 | 30.138 | 30.197                            |                    |                                  |
| E433                                  | 11/7/12  | U6B std., 10e6      | U6B                    | 31.162             | 31.285 | 31.430 | 31.292                            |                    |                                  |
| E433                                  | 11/7/12  | U6B std., 10e7      | U6B                    | 27.380             | 27.319 | 27.477 | 27.392                            |                    |                                  |
| E433                                  | 11/7/12  | U6B std., 10e7      | U6B                    | 27.438             | 27.300 | 27.293 | 27.344                            |                    |                                  |
| E433                                  | 11/7/12  | U6B std., 10e8      | U6B                    | 22.563             | 22.629 | 22.496 | 22.563                            |                    |                                  |
| E433                                  | 11/7/12  | U6B std., 10e8      | U6B                    | 22.277             | 22.346 | 22.138 | 22.254                            |                    |                                  |
| E433                                  | 11/7/12  | U6B std., 10e9      | U6B                    | 18.938             | 18.925 | 18.688 | 18.851                            |                    |                                  |
| E433                                  | 11/7/12  | U6B std., 10e9      | U6B                    | 18.939             | 18.771 | 18.949 | 18.886                            |                    |                                  |
| E433                                  | 11/7/12  | none (water)        | U6B                    | undet              | undet  | undet  | undet                             |                    |                                  |
| E366                                  | 6/10/11  | miR-21 std., 10e2   | miR-21                 | 30.863             | 30.842 | 30.793 | 30.833                            |                    |                                  |
| E366                                  | 6/10/11  | miR-21 std., 10e2   | miR-21                 | 30.064             | 29.949 | 30.442 | 30.151                            |                    |                                  |
| E366                                  | 6/10/11  | miR-21 std., 10e3   | miR-21                 | 30.478             | 30.577 | 30.670 | 30.575                            |                    |                                  |
| E366                                  | 6/10/11  | miR-21 std., 10e3   | miR-21                 | 29.807             | 29.811 | 30.590 | 30.069                            |                    |                                  |
| E366                                  | 6/10/11  | miR-21 std., 10e4   | miR-21                 | 28.144             | 28.131 | 27.940 | 28.072                            |                    |                                  |
| E366                                  | 6/10/11  | miR-21 std., 10e4   | miR-21                 | 26.714             | 26.566 | 26.711 | 26.664                            |                    |                                  |

|      |         |                           |                |        |        |        |        |
|------|---------|---------------------------|----------------|--------|--------|--------|--------|
| E366 | 6/10/11 | <i>miR-21</i> std., 10e5  | <i>miR-21</i>  | 25.725 | 25.936 | 25.765 | 25.809 |
| E366 | 6/10/11 | <i>miR-21</i> std., 10e5  | <i>miR-21</i>  | 25.503 | 25.563 | 25.556 | 25.540 |
| E366 | 6/10/11 | <i>miR-21</i> std., 10e6  | <i>miR-21</i>  | 22.392 | 22.385 | 22.271 | 22.350 |
| E366 | 6/10/11 | <i>miR-21</i> std., 10e6  | <i>miR-21</i>  | 22.249 | 22.303 | 22.136 | 22.229 |
| E366 | 6/10/11 | <i>miR-21</i> std., 10e7  | <i>miR-21</i>  | 18.548 | 18.530 | 18.635 | 18.571 |
| E366 | 6/10/11 | <i>miR-21</i> std., 10e7  | <i>miR-21</i>  | 18.616 | 18.639 | 18.695 | 18.650 |
| E366 | 6/10/11 | <i>miR-21</i> std., 10e8  | <i>miR-21</i>  | 15.539 | 15.515 | 15.509 | 15.521 |
| E366 | 6/10/11 | <i>miR-21</i> std., 10e8  | <i>miR-21</i>  | 15.596 | 15.515 | 15.548 | 15.553 |
| E366 | 6/10/11 | none (water)              | <i>miR-21</i>  | undet  | undet  | undet  | undet  |
| E433 | 11/1/12 | <i>miR-205</i> std., 10e2 | <i>miR-205</i> | undet  | undet  | 35.309 | undet  |
| E433 | 11/1/12 | <i>miR-205</i> std., 10e2 | <i>miR-205</i> | 31.895 | 31.899 | 30.953 | 31.582 |
| E433 | 11/1/12 | <i>miR-205</i> std., 10e3 | <i>miR-205</i> | 30.544 | 30.147 | 30.254 | 30.315 |
| E433 | 11/1/12 | <i>miR-205</i> std., 10e3 | <i>miR-205</i> | 30.357 | 30.679 | 30.562 | 30.533 |
| E433 | 11/1/12 | <i>miR-205</i> std., 10e4 | <i>miR-205</i> | 30.151 | 30.514 | 29.795 | 30.154 |
| E433 | 11/1/12 | <i>miR-205</i> std., 10e4 | <i>miR-205</i> | 29.001 | 29.390 | 28.907 | 29.099 |
| E433 | 11/1/12 | <i>miR-205</i> std., 10e5 | <i>miR-205</i> | 26.935 | 26.883 | 27.008 | 26.942 |
| E433 | 11/1/12 | <i>miR-205</i> std., 10e5 | <i>miR-205</i> | 26.194 | 25.834 | 25.945 | 25.991 |
| E433 | 11/1/12 | <i>miR-205</i> std., 10e6 | <i>miR-205</i> | 22.969 | 23.111 | 22.984 | 23.021 |
| E433 | 11/1/12 | <i>miR-205</i> std., 10e6 | <i>miR-205</i> | 22.319 | 22.432 | 22.430 | 22.393 |
| E433 | 11/1/12 | <i>miR-205</i> std., 10e7 | <i>miR-205</i> | 18.921 | 18.768 | 18.858 | 18.849 |
| E433 | 11/1/12 | <i>miR-205</i> std., 10e7 | <i>miR-205</i> | 18.757 | 18.805 | 18.727 | 18.763 |
| E433 | 11/1/12 | <i>miR-205</i> std., 10e8 | <i>miR-205</i> | 15.388 | 14.987 | 15.344 | 15.240 |
| E433 | 11/1/12 | <i>miR-205</i> std., 10e8 | <i>miR-205</i> | 15.367 | 15.397 | 15.364 | 15.376 |
| E433 | 11/1/12 | none (water)              | <i>miR-205</i> | undet  | undet  | undet  | undet  |

**For assays of tissue RNA samples**

|      |          |    |            |        |        |        |        |       |        |
|------|----------|----|------------|--------|--------|--------|--------|-------|--------|
| E434 | 11/10/12 | 1  | <i>U6B</i> | 27.870 | 27.914 | 27.779 | 27.854 | 0.294 | 28.148 |
| E434 | 11/10/12 | 2  | <i>U6B</i> | 27.938 | 28.072 | 27.819 | 27.943 | 0.294 | 28.237 |
| E434 | 11/10/12 | 3  | <i>U6B</i> | 27.424 | 27.283 | 27.303 | 27.337 | 0.294 | 27.631 |
| E434 | 11/10/12 | 4  | <i>U6B</i> | 27.672 | 27.456 | 27.556 | 27.562 | 0.294 | 27.856 |
| E434 | 11/10/12 | 6  | <i>U6B</i> | 28.068 | 28.257 | 28.069 | 28.131 | 0.294 | 28.425 |
| E434 | 11/10/12 | 10 | <i>U6B</i> | 26.891 | 26.679 | 26.722 | 26.764 | 0.294 | 27.058 |
| E434 | 11/10/12 | 11 | <i>U6B</i> | 27.839 | 27.737 | 27.794 | 27.790 | 0.294 | 28.084 |
| E434 | 11/10/12 | 14 | <i>U6B</i> | 25.620 | 25.708 | 25.486 | 25.605 | 0.294 | 25.899 |
| E434 | 11/10/12 | 17 | <i>U6B</i> | 26.893 | 26.701 | 26.774 | 26.789 | 0.294 | 27.083 |
| E434 | 11/10/12 | 18 | <i>U6B</i> | 26.748 | 26.627 | 26.541 | 26.639 | 0.294 | 26.933 |
| E434 | 11/10/12 | 20 | <i>U6B</i> | 26.083 | 26.231 | 26.329 | 26.214 | 0.294 | 26.508 |
| E434 | 11/10/12 | 21 | <i>U6B</i> | 27.504 | 27.674 | 27.423 | 27.534 | 0.294 | 27.828 |
| E434 | 11/10/12 | 22 | <i>U6B</i> | 27.015 | 26.866 | 26.987 | 26.956 | 0.294 | 27.250 |
| E434 | 11/10/12 | 23 | <i>U6B</i> | 26.593 | 26.424 | 26.670 | 26.562 | 0.294 | 26.856 |
| E434 | 11/10/12 | 24 | <i>U6B</i> | 25.761 | 25.658 | 25.524 | 25.647 | 0.294 | 25.941 |
| E434 | 11/10/12 | 25 | <i>U6B</i> | 26.149 | 26.392 | 26.337 | 26.293 | 0.294 | 26.587 |
| E434 | 11/10/12 | 26 | <i>U6B</i> | 25.735 | 25.732 | 25.943 | 25.803 | 0.294 | 26.097 |
| E434 | 11/10/12 | 27 | <i>U6B</i> | 27.251 | 27.325 | 27.272 | 27.283 | 0.294 | 27.577 |
| E434 | 11/10/12 | 30 | <i>U6B</i> | 26.452 | 26.536 | 26.618 | 26.535 | 0.294 | 26.829 |
| E434 | 11/10/12 | 31 | <i>U6B</i> | 25.634 | 25.583 | 25.531 | 25.583 | 0.294 | 25.877 |
| E434 | 11/10/12 | 32 | <i>U6B</i> | 29.966 | 30.125 | 30.212 | 30.101 | 0.294 | 30.395 |
| E434 | 11/10/12 | 34 | <i>U6B</i> | 25.791 | 25.909 | 25.723 | 25.808 | 0.294 | 26.102 |
| E434 | 11/10/12 | 36 | <i>U6B</i> | 24.781 | 24.902 | 24.986 | 24.890 | 0.294 | 25.184 |
| E434 | 11/10/12 | 37 | <i>U6B</i> | 24.733 | 24.860 | 24.724 | 24.772 | 0.294 | 25.066 |
| E434 | 11/10/12 | 38 | <i>U6B</i> | 25.457 | 25.347 | 25.597 | 25.467 | 0.294 | 25.761 |
| E434 | 11/10/12 | 39 | <i>U6B</i> | 28.484 | 28.276 | 28.322 | 28.361 | 0.294 | 28.655 |

|      |          |                |         |        |        |        |        |       |        |
|------|----------|----------------|---------|--------|--------|--------|--------|-------|--------|
| E434 | 11/10/12 | 40             | U6B     | 26.186 | 26.152 | 26.182 | 26.173 | 0.294 | 26.467 |
| E434 | 11/10/12 | 41             | U6B     | 25.839 | 25.773 | 26.020 | 25.877 | 0.294 | 26.171 |
| E434 | 11/10/12 | 42             | U6B     | 25.148 | 25.158 | 25.258 | 25.188 | 0.294 | 25.482 |
| E434 | 11/10/12 | 46             | U6B     | 24.752 | 24.688 | 24.784 | 24.741 | 0.294 | 25.035 |
| E434 | 11/10/12 | 48             | U6B     | 25.664 | 25.766 | 25.580 | 25.670 | 0.294 | 25.964 |
| E434 | 11/10/12 | 49             | U6B     | 25.780 | 25.868 | 25.851 | 25.833 | 0.294 | 26.127 |
| E434 | 11/10/12 | 51             | U6B     | 26.737 | 26.892 | 26.855 | 26.828 | 0.294 | 27.122 |
| E434 | 11/10/12 | 53             | U6B     | 26.356 | 26.257 | 26.397 | 26.337 | 0.294 | 26.631 |
| E434 | 11/10/12 | 54             | U6B     | 25.719 | 25.804 | 25.684 | 25.735 | 0.294 | 26.029 |
| E434 | 11/10/12 | 56             | U6B     | 25.581 | 25.594 | 25.665 | 25.613 | 0.294 | 25.907 |
| E434 | 11/10/12 | 57             | U6B     | 29.056 | 28.943 | 28.916 | 28.971 | 0.294 | 29.265 |
| E434 | 11/10/12 | 60             | U6B     | 27.341 | 27.363 | 27.576 | 27.427 | 0.294 | 27.721 |
| E434 | 11/10/12 | 62             | U6B     | 26.673 | 26.792 | 26.685 | 26.717 | 0.294 | 27.011 |
| E434 | 11/10/12 | 64             | U6B     | 26.964 | 26.565 | 26.607 | 26.712 | 0.294 | 27.006 |
| E434 | 11/10/12 | 67             | U6B     | 28.469 | 28.157 | 28.420 | 28.349 | 0.294 | 28.643 |
| E434 | 11/10/12 | 68             | U6B     | 26.784 | 26.612 | 26.802 | 26.732 | 0.294 | 27.026 |
| E434 | 11/10/12 | 70             | U6B     | 26.802 | 26.925 | 26.847 | 26.858 | 0.294 | 27.152 |
| E434 | 11/10/12 | 74             | U6B     | 27.924 | 27.767 | 27.818 | 27.836 | 0.294 | 28.130 |
| E434 | 11/10/12 | 75             | U6B     | 27.289 | 27.312 | 27.109 | 27.237 | 0.294 | 27.531 |
| E434 | 11/10/12 | 76             | U6B     | 25.923 | 25.908 | 25.851 | 25.894 | 0.294 | 26.188 |
| E434 | 11/10/12 | 77             | U6B     | 26.061 | 26.140 | 26.193 | 26.131 | 0.294 | 26.425 |
| E434 | 11/10/12 | 80             | U6B     | 26.010 | 25.941 | 26.152 | 26.034 | 0.294 | 26.328 |
| E434 | 11/10/12 | 8              | U6B     | 30.682 | 30.422 | 30.453 | 30.519 | 0.294 | 30.813 |
| E434 | 11/10/12 | 9              | U6B     | 27.070 | 26.772 | 26.917 | 26.920 | 0.294 | 27.214 |
| E434 | 11/10/12 | 12             | U6B     | 26.880 | 26.797 | 26.862 | 26.846 | 0.294 | 27.140 |
| E434 | 11/10/12 | 19             | U6B     | 30.321 | 30.197 | 29.972 | 30.163 | 0.294 | 30.457 |
| E434 | 11/10/12 | 33             | U6B     | 28.257 | 28.018 | 28.116 | 28.130 | 0.294 | 28.424 |
| E434 | 11/10/12 | 63             | U6B     | 27.269 | 27.304 | 27.373 | 27.315 | 0.294 | 27.609 |
| E434 | 11/10/12 | 66             | U6B     | 26.560 | 26.366 | 26.323 | 26.416 | 0.294 | 26.710 |
| E434 | 11/10/12 | 79             | U6B     | 27.551 | 27.195 | 27.257 | 27.334 | 0.294 | 27.628 |
| E434 | 11/10/12 | U6B std., 10e5 | U6B     | 32.388 | 32.995 | 32.678 | 32.687 | 0.294 | 32.981 |
| E434 | 11/10/12 | U6B std., 10e5 | U6B     | 32.694 | 33.193 | 33.194 | 33.027 | 0.294 | 33.321 |
| E434 | 11/10/12 | U6B std., 10e7 | U6B     | 27.291 | 27.208 | 27.353 | 27.284 | 0.294 | 27.578 |
| E434 | 11/10/12 | U6B std., 10e7 | U6B     | 26.997 | 26.965 | 27.101 | 27.021 | 0.294 | 27.315 |
| E434 | 11/10/12 | 1              | miR-375 | 24.553 | 24.676 | 24.602 | 24.610 | 0.070 | 24.680 |
| E434 | 11/10/12 | 2              | miR-375 | 25.867 | 25.665 | 25.777 | 25.770 | 0.070 | 25.840 |
| E434 | 11/10/12 | 3              | miR-375 | 26.672 | 26.755 | 26.614 | 26.680 | 0.070 | 26.750 |
| E434 | 11/10/12 | 4              | miR-375 | 23.809 | 23.761 | 23.661 | 23.744 | 0.070 | 23.814 |
| E434 | 11/10/12 | 6              | miR-375 | 23.568 | 23.494 | 23.350 | 23.470 | 0.070 | 23.540 |
| E434 | 11/10/12 | 10             | miR-375 | 28.452 | 28.207 | 28.408 | 28.356 | 0.070 | 28.426 |
| E434 | 11/10/12 | 11             | miR-375 | 27.351 | 27.303 | 26.958 | 27.204 | 0.070 | 27.274 |
| E434 | 11/10/12 | 14             | miR-375 | 26.862 | 26.613 | 26.694 | 26.723 | 0.070 | 26.793 |
| E434 | 11/10/12 | 17             | miR-375 | 28.344 | 28.313 | 28.514 | 28.390 | 0.070 | 28.460 |
| E434 | 11/10/12 | 18             | miR-375 | 27.840 | 27.610 | 27.814 | 27.755 | 0.070 | 27.825 |
| E434 | 11/10/12 | 20             | miR-375 | 25.831 | 25.788 | 25.905 | 25.841 | 0.070 | 25.911 |
| E434 | 11/10/12 | 21             | miR-375 | 25.629 | 25.650 | 25.467 | 25.582 | 0.070 | 25.652 |
| E434 | 11/10/12 | 22             | miR-375 | 26.732 | 26.838 | 26.664 | 26.745 | 0.070 | 26.815 |
| E434 | 11/10/12 | 23             | miR-375 | 29.746 | 29.775 | 29.736 | 29.752 | 0.070 | 29.822 |
| E434 | 11/10/12 | 24             | miR-375 | 26.309 | 26.565 | 26.408 | 26.427 | 0.070 | 26.497 |
| E434 | 11/10/12 | 25             | miR-375 | 26.986 | 26.841 | 26.875 | 26.901 | 0.070 | 26.971 |
| E434 | 11/10/12 | 26             | miR-375 | 27.894 | 28.211 | 27.988 | 28.031 | 0.070 | 28.101 |
| E434 | 11/10/12 | 27             | miR-375 | 22.283 | 21.899 | 22.277 | 22.153 | 0.070 | 22.223 |

|      |          |                    |         |        |        |        |        |       |        |
|------|----------|--------------------|---------|--------|--------|--------|--------|-------|--------|
| E434 | 11/10/12 | 30                 | miR-375 | 27.818 | 27.845 | 27.960 | 27.874 | 0.070 | 27.944 |
| E434 | 11/10/12 | 31                 | miR-375 | 23.564 | 23.759 | 23.587 | 23.637 | 0.070 | 23.707 |
| E434 | 11/10/12 | 32                 | miR-375 | 26.953 | 27.377 | 27.069 | 27.133 | 0.070 | 27.203 |
| E434 | 11/10/12 | 34                 | miR-375 | 24.333 | 23.952 | 24.313 | 24.200 | 0.070 | 24.270 |
| E434 | 11/10/12 | 36                 | miR-375 | 24.626 | 24.536 | 24.471 | 24.544 | 0.070 | 24.614 |
| E434 | 11/10/12 | 37                 | miR-375 | 26.410 | 26.464 | 26.639 | 26.504 | 0.070 | 26.574 |
| E434 | 11/10/12 | 38                 | miR-375 | 26.790 | 26.757 | 26.597 | 26.715 | 0.070 | 26.785 |
| E434 | 11/10/12 | 39                 | miR-375 | 27.629 | 27.586 | 27.422 | 27.546 | 0.070 | 27.616 |
| E434 | 11/10/12 | 40                 | miR-375 | 26.643 | 26.716 | 26.332 | 26.564 | 0.070 | 26.634 |
| E434 | 11/10/12 | 41                 | miR-375 | 27.348 | 27.312 | 27.055 | 27.239 | 0.070 | 27.309 |
| E434 | 11/10/12 | 42                 | miR-375 | 24.426 | 24.484 | 24.451 | 24.453 | 0.070 | 24.523 |
| E434 | 11/10/12 | 46                 | miR-375 | 26.170 | 25.882 | 26.219 | 26.090 | 0.070 | 26.160 |
| E434 | 11/10/12 | 48                 | miR-375 | 29.187 | 29.338 | 29.372 | 29.299 | 0.070 | 29.369 |
| E434 | 11/10/12 | 49                 | miR-375 | 27.995 | 27.959 | 27.809 | 27.921 | 0.070 | 27.991 |
| E434 | 11/10/12 | 51                 | miR-375 | 24.994 | 24.916 | 24.928 | 24.946 | 0.070 | 25.016 |
| E434 | 11/10/12 | 53                 | miR-375 | 27.045 | 27.515 | 27.399 | 27.320 | 0.070 | 27.390 |
| E434 | 11/10/12 | 54                 | miR-375 | 23.673 | 23.605 | 23.666 | 23.648 | 0.070 | 23.718 |
| E434 | 11/10/12 | 56                 | miR-375 | 26.749 | 26.606 | 26.605 | 26.654 | 0.070 | 26.724 |
| E434 | 11/10/12 | 57                 | miR-375 | 28.445 | 28.490 | 28.285 | 28.407 | 0.070 | 28.477 |
| E434 | 11/10/12 | 60                 | miR-375 | 23.944 | 23.966 | 24.303 | 24.071 | 0.070 | 24.141 |
| E434 | 11/10/12 | 62                 | miR-375 | 28.436 | 28.426 | 28.427 | 28.430 | 0.070 | 28.500 |
| E434 | 11/10/12 | 64                 | miR-375 | 28.447 | 28.320 | 28.213 | 28.326 | 0.070 | 28.396 |
| E434 | 11/10/12 | 67                 | miR-375 | 27.431 | 27.744 | 27.575 | 27.583 | 0.070 | 27.653 |
| E434 | 11/10/12 | 68                 | miR-375 | 25.854 | 25.776 | 25.871 | 25.834 | 0.070 | 25.904 |
| E434 | 11/10/12 | 70                 | miR-375 | 24.341 | 24.250 | 24.422 | 24.338 | 0.070 | 24.408 |
| E434 | 11/10/12 | 74                 | miR-375 | 22.913 | 22.987 | 22.933 | 22.944 | 0.070 | 23.014 |
| E434 | 11/10/12 | 75                 | miR-375 | 24.557 | 24.467 | 24.396 | 24.473 | 0.070 | 24.543 |
| E434 | 11/10/12 | 76                 | miR-375 | 23.726 | 23.569 | 23.578 | 23.624 | 0.070 | 23.694 |
| E434 | 11/10/12 | 77                 | miR-375 | 22.869 | 22.894 | 22.906 | 22.890 | 0.070 | 22.960 |
| E434 | 11/10/12 | 80                 | miR-375 | 28.722 | 29.070 | 29.027 | 28.940 | 0.070 | 29.010 |
| E434 | 11/10/12 | 8                  | miR-375 | 26.460 | 26.031 | 26.151 | 26.214 | 0.070 | 26.284 |
| E434 | 11/10/12 | 9                  | miR-375 | 24.756 | 24.905 | 24.719 | 24.793 | 0.070 | 24.863 |
| E434 | 11/10/12 | 12                 | miR-375 | 25.287 | 25.210 | 25.241 | 25.246 | 0.070 | 25.316 |
| E434 | 11/10/12 | 19                 | miR-375 | 26.494 | 26.408 | 26.373 | 26.425 | 0.070 | 26.495 |
| E434 | 11/10/12 | 33                 | miR-375 | 27.528 | 27.565 | 27.685 | 27.592 | 0.070 | 27.662 |
| E434 | 11/10/12 | 63                 | miR-375 | 25.527 | 25.591 | 25.529 | 25.549 | 0.070 | 25.619 |
| E434 | 11/10/12 | 66                 | miR-375 | 30.266 | 30.011 | 30.316 | 30.198 | 0.070 | 30.268 |
| E434 | 11/10/12 | 79                 | miR-375 | 28.737 | 28.628 | 28.421 | 28.595 | 0.070 | 28.665 |
| E434 | 11/10/12 | miR-375 std., 10e3 | miR-375 | 23.876 | 23.722 | 24.251 | 23.950 | 0.070 | 24.020 |
| E434 | 11/10/12 | miR-375 std., 10e3 | miR-375 | 23.689 | 23.722 | 23.748 | 23.720 | 0.070 | 23.790 |
| E434 | 11/10/12 | miR-375 std., 10e5 | miR-375 | 21.614 | 21.622 | 21.790 | 21.675 | 0.070 | 21.745 |
| E434 | 11/10/12 | miR-375 std., 10e5 | miR-375 | 21.852 | 21.918 | 21.637 | 21.802 | 0.070 | 21.872 |
| E365 | 6/20/11  | 1                  | U6B     | 27.059 | 26.858 | 26.713 | 26.877 | 1.246 | 28.123 |
| E365 | 6/20/11  | 2                  | U6B     | 27.408 | 27.406 | 27.156 | 27.323 | 1.246 | 28.569 |
| E365 | 6/20/11  | 3                  | U6B     | 25.807 | 25.783 | 25.694 | 25.761 | 1.246 | 27.007 |
| E365 | 6/20/11  | 4                  | U6B     | 25.770 | 25.814 | 25.942 | 25.842 | 1.246 | 27.088 |
| E365 | 6/20/11  | 6                  | U6B     | 25.907 | 25.930 | 26.008 | 25.948 | 1.246 | 27.194 |
| E365 | 6/20/11  | 10                 | U6B     | 26.172 | 26.133 | 26.075 | 26.127 | 1.246 | 27.373 |
| E365 | 6/20/11  | 11                 | U6B     | 27.343 | 27.216 | 27.215 | 27.258 | 1.246 | 28.504 |
| E365 | 6/20/11  | 14                 | U6B     | 25.096 | 25.192 | 25.172 | 25.153 | 1.246 | 26.399 |
| E365 | 6/20/11  | 17                 | U6B     | 25.840 | 25.598 | 25.619 | 25.686 | 1.246 | 26.932 |
| E365 | 6/20/11  | 18                 | U6B     | 26.026 | 26.147 | 25.917 | 26.030 | 1.246 | 27.276 |

|      |         |                           |                |        |        |        |        |        |        |
|------|---------|---------------------------|----------------|--------|--------|--------|--------|--------|--------|
| E365 | 6/20/11 | 1                         | <i>miR-21</i>  | 20.965 | 20.935 | 20.742 | 20.881 | -0.557 | 20.324 |
| E365 | 6/20/11 | 2                         | <i>miR-21</i>  | 23.264 | 23.193 | 23.283 | 23.247 | -0.557 | 22.690 |
| E365 | 6/20/11 | 3                         | <i>miR-21</i>  | 22.388 | 22.312 | 21.945 | 22.215 | -0.557 | 21.658 |
| E365 | 6/20/11 | 4                         | <i>miR-21</i>  | 21.523 | 21.895 | 21.437 | 21.618 | -0.557 | 21.061 |
| E365 | 6/20/11 | 6                         | <i>miR-21</i>  | 20.842 | 20.706 | 20.717 | 20.755 | -0.557 | 20.198 |
| E365 | 6/20/11 | 10                        | <i>miR-21</i>  | 22.035 | 22.177 | 22.101 | 22.105 | -0.557 | 21.548 |
| E365 | 6/20/11 | 11                        | <i>miR-21</i>  | 21.299 | 21.480 | 21.421 | 21.400 | -0.557 | 20.843 |
| E365 | 6/20/11 | 14                        | <i>miR-21</i>  | 19.679 | 19.687 | 19.496 | 19.621 | -0.557 | 19.064 |
| E365 | 6/20/11 | 17                        | <i>miR-21</i>  | 20.225 | 20.012 | 20.023 | 20.087 | -0.557 | 19.530 |
| E365 | 6/20/11 | 18                        | <i>miR-21</i>  | 21.315 | 21.262 | 21.208 | 21.262 | -0.557 | 20.705 |
| E365 | 6/20/11 | 1                         | <i>miR-205</i> | 29.986 | 30.004 | 29.927 | 29.972 | 1.059  | 31.031 |
| E365 | 6/20/11 | 2                         | <i>miR-205</i> | 28.164 | 28.177 | 27.813 | 28.051 | 1.059  | 29.110 |
| E365 | 6/20/11 | 3                         | <i>miR-205</i> | 27.526 | 27.455 | 27.411 | 27.464 | 1.059  | 28.523 |
| E365 | 6/20/11 | 4                         | <i>miR-205</i> | 24.166 | 23.848 | 23.850 | 23.955 | 1.059  | 25.014 |
| E365 | 6/20/11 | 6                         | <i>miR-205</i> | 27.449 | 27.585 | 27.569 | 27.535 | 1.059  | 28.594 |
| E365 | 6/20/11 | 10                        | <i>miR-205</i> | 20.852 | 20.677 | 20.747 | 20.759 | 1.059  | 21.818 |
| E365 | 6/20/11 | 11                        | <i>miR-205</i> | 20.774 | 20.640 | 20.761 | 20.725 | 1.059  | 21.784 |
| E365 | 6/20/11 | 14                        | <i>miR-205</i> | 26.098 | 26.108 | 25.835 | 26.014 | 1.059  | 27.073 |
| E365 | 6/20/11 | 17                        | <i>miR-205</i> | 19.740 | 19.923 | 20.039 | 19.901 | 1.059  | 20.960 |
| E365 | 6/20/11 | 18                        | <i>miR-205</i> | 23.127 | 22.832 | 22.663 | 22.874 | 1.059  | 23.933 |
| E365 | 6/20/11 | <i>U6B std., 10e7</i>     | <i>U6B</i>     | 26.433 | 26.226 | 26.256 | 26.305 | 1.246  | 27.551 |
| E365 | 6/20/11 | <i>U6B std., 10e7</i>     | <i>U6B</i>     | 25.909 | 26.065 | 25.845 | 25.940 | 1.246  | 27.186 |
| E365 | 6/20/11 | <i>miR-21 std., 10e2</i>  | <i>miR-21</i>  | 30.825 | 30.804 | 31.469 | 31.033 | -0.557 | 30.476 |
| E365 | 6/20/11 | <i>miR-21 std., 10e2</i>  | <i>miR-21</i>  | 31.463 | 31.256 | 31.357 | 31.359 | -0.557 | 30.802 |
| E365 | 6/20/11 | <i>miR-21 std., 10e5</i>  | <i>miR-21</i>  | 26.172 | 26.394 | 26.296 | 26.287 | -0.557 | 25.730 |
| E365 | 6/20/11 | <i>miR-21 std., 10e5</i>  | <i>miR-21</i>  | 25.959 | 25.896 | 25.797 | 25.884 | -0.557 | 25.327 |
| E365 | 6/20/11 | <i>miR-205 std., 10e2</i> | <i>miR-205</i> | 30.325 | 30.461 | 30.586 | 30.457 | 1.059  | 31.516 |
| E365 | 6/20/11 | <i>miR-205 std., 10e2</i> | <i>miR-205</i> | 30.437 | 30.498 | 30.242 | 30.392 | 1.059  | 31.451 |
| E365 | 6/20/11 | <i>miR-205 std., 10e5</i> | <i>miR-205</i> | 25.522 | 25.607 | 25.389 | 25.506 | 1.059  | 26.565 |
| E365 | 6/28/11 | 20                        | <i>U6B</i>     | 25.398 | 25.363 | 25.341 | 25.367 | 0.623  | 25.990 |
| E365 | 6/28/11 | 21                        | <i>U6B</i>     | 26.320 | 26.317 | 26.150 | 26.262 | 0.623  | 26.885 |
| E365 | 6/28/11 | 22                        | <i>U6B</i>     | 25.613 | 25.760 | 25.679 | 25.684 | 0.623  | 26.307 |
| E365 | 6/28/11 | 23                        | <i>U6B</i>     | 25.555 | 25.478 | 25.562 | 25.532 | 0.623  | 26.155 |
| E365 | 6/28/11 | 24                        | <i>U6B</i>     | 24.940 | 24.877 | 25.034 | 24.950 | 0.623  | 25.573 |
| E365 | 6/28/11 | 25                        | <i>U6B</i>     | 24.990 | 24.821 | 24.819 | 24.877 | 0.623  | 25.500 |
| E365 | 6/28/11 | 26                        | <i>U6B</i>     | 24.889 | 24.859 | 24.816 | 24.855 | 0.623  | 25.478 |
| E365 | 6/28/11 | 27                        | <i>U6B</i>     | 25.868 | 25.998 | 26.016 | 25.961 | 0.623  | 26.584 |
| E365 | 6/28/11 | 30                        | <i>U6B</i>     | 25.510 | 25.326 | 25.390 | 25.409 | 0.623  | 26.032 |
| E365 | 6/28/11 | 31                        | <i>U6B</i>     | 24.664 | 24.420 | 24.417 | 24.500 | 0.623  | 25.123 |
| E365 | 6/28/11 | 32                        | <i>U6B</i>     | 29.624 | 29.774 | 29.418 | 29.605 | 0.623  | 30.228 |
| E365 | 6/28/11 | 34                        | <i>U6B</i>     | 25.483 | 25.376 | 25.344 | 25.401 | 0.623  | 26.024 |
| E365 | 6/28/11 | 36                        | <i>U6B</i>     | 24.618 | 24.674 | 24.638 | 24.643 | 0.623  | 25.266 |
| E365 | 6/28/11 | 37                        | <i>U6B</i>     | 24.325 | 24.214 | 24.001 | 24.180 | 0.623  | 24.803 |
| E365 | 6/28/11 | 38                        | <i>U6B</i>     | 24.942 | 24.993 | 24.913 | 24.950 | 0.623  | 25.573 |
| E365 | 6/28/11 | 39                        | <i>U6B</i>     | 27.775 | 27.786 | 27.674 | 27.745 | 0.623  | 28.368 |
| E365 | 6/28/11 | 40                        | <i>U6B</i>     | 25.398 | 25.192 | 25.325 | 25.305 | 0.623  | 25.928 |
| E365 | 6/28/11 | 41                        | <i>U6B</i>     | 24.644 | 24.589 | 24.547 | 24.593 | 0.623  | 25.216 |
| E365 | 6/28/11 | 42                        | <i>U6B</i>     | 24.003 | 23.934 | 23.966 | 23.968 | 0.623  | 24.591 |
| E365 | 6/28/11 | 6                         | <i>U6B</i>     | 26.180 | 26.073 | 26.467 | 26.240 | 0.623  | 26.863 |
| E365 | 6/28/11 | 10                        | <i>U6B</i>     | 26.280 | 26.209 | 26.187 | 26.225 | 0.623  | 26.848 |
| E365 | 6/28/11 | 20                        | <i>miR-21</i>  | 20.940 | 21.039 | 20.926 | 20.968 | -0.728 | 20.240 |
| E365 | 6/28/11 | 21                        | <i>miR-21</i>  | 22.178 | 22.169 | 21.954 | 22.101 | -0.728 | 21.373 |

|      |         |                           |                |        |        |        |        |        |        |
|------|---------|---------------------------|----------------|--------|--------|--------|--------|--------|--------|
| E365 | 6/28/11 | 22                        | <i>miR-21</i>  | 20.449 | 20.636 | 20.508 | 20.531 | -0.728 | 19.803 |
| E365 | 6/28/11 | 23                        | <i>miR-21</i>  | 21.649 | 21.651 | 21.646 | 21.648 | -0.728 | 20.920 |
| E365 | 6/28/11 | 24                        | <i>miR-21</i>  | 20.480 | 20.493 | 20.412 | 20.462 | -0.728 | 19.734 |
| E365 | 6/28/11 | 25                        | <i>miR-21</i>  | 21.424 | 21.399 | 21.259 | 21.360 | -0.728 | 20.632 |
| E365 | 6/28/11 | 26                        | <i>miR-21</i>  | 21.902 | 22.235 | 22.043 | 22.060 | -0.728 | 21.332 |
| E365 | 6/28/11 | 27                        | <i>miR-21</i>  | 22.674 | 22.831 | 22.792 | 22.765 | -0.728 | 22.037 |
| E365 | 6/28/11 | 30                        | <i>miR-21</i>  | 20.982 | 21.038 | 20.882 | 20.967 | -0.728 | 20.239 |
| E365 | 6/28/11 | 31                        | <i>miR-21</i>  | 21.322 | 21.323 | 20.866 | 21.171 | -0.728 | 20.443 |
| E365 | 6/28/11 | 32                        | <i>miR-21</i>  | 19.673 | 19.658 | 19.574 | 19.635 | -0.728 | 18.907 |
| E365 | 6/28/11 | 34                        | <i>miR-21</i>  | 21.738 | 21.720 | 21.736 | 21.731 | -0.728 | 21.003 |
| E365 | 6/28/11 | 36                        | <i>miR-21</i>  | 20.970 | 20.927 | 20.739 | 20.878 | -0.728 | 20.150 |
| E365 | 6/28/11 | 37                        | <i>miR-21</i>  | 19.932 | 19.838 | 19.872 | 19.881 | -0.728 | 19.153 |
| E365 | 6/28/11 | 38                        | <i>miR-21</i>  | 20.654 | 21.160 | 20.564 | 20.792 | -0.728 | 20.064 |
| E365 | 6/28/11 | 39                        | <i>miR-21</i>  | 23.898 | 23.985 | 24.173 | 24.019 | -0.728 | 23.291 |
| E365 | 6/28/11 | 40                        | <i>miR-21</i>  | 20.190 | 20.244 | 20.031 | 20.155 | -0.728 | 19.427 |
| E365 | 6/28/11 | 41                        | <i>miR-21</i>  | 20.816 | 20.913 | 20.847 | 20.859 | -0.728 | 20.131 |
| E365 | 6/28/11 | 42                        | <i>miR-21</i>  | 21.668 | 21.709 | 21.817 | 21.731 | -0.728 | 21.003 |
| E365 | 6/28/11 | 6                         | <i>miR-21</i>  | 20.886 | 20.854 | 20.655 | 20.799 | -0.728 | 20.071 |
| E365 | 6/28/11 | 10                        | <i>miR-21</i>  | 22.359 | 22.370 | 22.394 | 22.374 | -0.728 | 21.646 |
| E365 | 6/28/11 | 20                        | <i>miR-205</i> | 27.932 | 27.802 | 28.019 | 27.917 | 0.811  | 28.728 |
| E365 | 6/28/11 | 21                        | <i>miR-205</i> | 26.657 | 26.472 | 26.616 | 26.582 | 0.811  | 27.393 |
| E365 | 6/28/11 | 22                        | <i>miR-205</i> | 20.799 | 21.087 | 20.727 | 20.871 | 0.811  | 21.682 |
| E365 | 6/28/11 | 23                        | <i>miR-205</i> | 21.278 | 21.514 | 21.305 | 21.366 | 0.811  | 22.177 |
| E365 | 6/28/11 | 24                        | <i>miR-205</i> | 31.377 | 30.293 | 31.015 | 30.895 | 0.811  | 31.706 |
| E365 | 6/28/11 | 25                        | <i>miR-205</i> | 28.751 | 29.301 | 28.943 | 28.998 | 0.811  | 29.809 |
| E365 | 6/28/11 | 26                        | <i>miR-205</i> | 21.929 | 21.855 | 21.720 | 21.835 | 0.811  | 22.646 |
| E365 | 6/28/11 | 27                        | <i>miR-205</i> | 27.643 | 27.697 | 27.569 | 27.636 | 0.811  | 28.447 |
| E365 | 6/28/11 | 30                        | <i>miR-205</i> | 20.468 | 20.485 | 20.398 | 20.450 | 0.811  | 21.261 |
| E365 | 6/28/11 | 31                        | <i>miR-205</i> | 28.730 | 28.819 | 28.808 | 28.786 | 0.811  | 29.597 |
| E365 | 6/28/11 | 32                        | <i>miR-205</i> | 26.195 | 26.097 | 25.917 | 26.070 | 0.811  | 26.881 |
| E365 | 6/28/11 | 34                        | <i>miR-205</i> | 30.910 | 30.888 | 31.672 | 31.156 | 0.811  | 31.967 |
| E365 | 6/28/11 | 36                        | <i>miR-205</i> | 25.528 | 25.559 | 25.466 | 25.518 | 0.811  | 26.329 |
| E365 | 6/28/11 | 37                        | <i>miR-205</i> | 30.144 | 29.879 | 30.174 | 30.066 | 0.811  | 30.877 |
| E365 | 6/28/11 | 38                        | <i>miR-205</i> | 21.930 | 21.951 | 21.762 | 21.881 | 0.811  | 22.692 |
| E365 | 6/28/11 | 39                        | <i>miR-205</i> | 25.582 | 25.433 | 25.509 | 25.508 | 0.811  | 26.319 |
| E365 | 6/28/11 | 40                        | <i>miR-205</i> | 27.484 | 27.475 | 27.714 | 27.558 | 0.811  | 28.369 |
| E365 | 6/28/11 | 41                        | <i>miR-205</i> | 23.527 | 23.604 | 23.561 | 23.564 | 0.811  | 24.375 |
| E365 | 6/28/11 | 42                        | <i>miR-205</i> | 26.797 | 26.654 | 26.648 | 26.700 | 0.811  | 27.511 |
| E365 | 6/28/11 | 6                         | <i>miR-205</i> | 28.199 | 27.882 | 28.422 | 28.168 | 0.811  | 28.979 |
| E365 | 6/28/11 | 10                        | <i>miR-205</i> | 20.951 | 20.929 | 20.817 | 20.899 | 0.811  | 21.710 |
| E365 | 6/28/11 | <i>U6B std., 10e4</i>     | <i>U6B</i>     | 36.159 | 39.480 | undet  | 37.820 | 0.623  | 38.443 |
| E365 | 6/28/11 | <i>U6B std., 10e7</i>     | <i>U6B</i>     | 26.341 | 26.279 | 26.120 | 26.247 | 0.623  | 26.870 |
| E365 | 6/28/11 | <i>U6B std., 10e7</i>     | <i>U6B</i>     | 26.885 | 27.002 | 26.836 | 26.907 | 0.623  | 27.530 |
| E365 | 6/28/11 | <i>miR-21 std., 10e2</i>  | <i>miR-21</i>  | 31.000 | 30.899 | 31.332 | 31.077 | -0.728 | 30.349 |
| E365 | 6/28/11 | <i>miR-21 std., 10e5</i>  | <i>miR-21</i>  | 26.734 | 26.664 | 26.692 | 26.697 | -0.728 | 25.969 |
| E365 | 6/28/11 | <i>miR-21 std., 10e5</i>  | <i>miR-21</i>  | 26.409 | 26.327 | 26.456 | 26.398 | -0.728 | 25.670 |
| E365 | 6/28/11 | <i>miR-205 std., 10e2</i> | <i>miR-205</i> | 31.293 | 30.985 | 31.379 | 31.219 | 0.811  | 32.030 |
| E365 | 6/28/11 | <i>miR-205 std., 10e2</i> | <i>miR-205</i> | 30.727 | 30.784 | 30.649 | 30.720 | 0.811  | 31.531 |
| E365 | 6/28/11 | <i>miR-205 std., 10e5</i> | <i>miR-205</i> | 25.482 | 25.563 | 25.550 | 25.532 | 0.811  | 26.343 |
| E365 | 6/28/11 | <i>miR-205 std., 10e5</i> | <i>miR-205</i> | 25.337 | 25.455 | 25.357 | 25.383 | 0.811  | 26.194 |
| E365 | 6/29/11 | 46                        | <i>U6B</i>     | 24.326 | 24.300 | 24.328 | 24.318 | 0.289  | 24.607 |
| E365 | 6/29/11 | 48                        | <i>U6B</i>     | 25.339 | 25.214 | 25.254 | 25.269 | 0.289  | 25.558 |

|      |         |    |         |        |        |        |        |        |        |
|------|---------|----|---------|--------|--------|--------|--------|--------|--------|
| E365 | 6/29/11 | 49 | U6B     | 25.460 | 25.393 | 25.444 | 25.432 | 0.289  | 25.721 |
| E365 | 6/29/11 | 51 | U6B     | 26.562 | 26.036 | 26.004 | 26.201 | 0.289  | 26.490 |
| E365 | 6/29/11 | 53 | U6B     | 25.691 | 25.487 | 27.064 | 25.589 | 0.289  | 25.878 |
| E365 | 6/29/11 | 54 | U6B     | 24.747 | 24.697 | 24.755 | 24.733 | 0.289  | 25.022 |
| E365 | 6/29/11 | 56 | U6B     | 24.701 | 24.783 | 24.768 | 24.751 | 0.289  | 25.040 |
| E365 | 6/29/11 | 57 | U6B     | 28.132 | 28.218 | 28.053 | 28.134 | 0.289  | 28.423 |
| E365 | 6/29/11 | 60 | U6B     | 26.529 | 26.433 | 26.318 | 26.426 | 0.289  | 26.715 |
| E365 | 6/29/11 | 62 | U6B     | 26.669 | 26.534 | 26.341 | 26.514 | 0.289  | 26.803 |
| E365 | 6/29/11 | 64 | U6B     | 26.019 | 26.198 | 26.216 | 26.144 | 0.289  | 26.433 |
| E365 | 6/29/11 | 67 | U6B     | 27.216 | 27.067 | 26.969 | 27.084 | 0.289  | 27.373 |
| E365 | 6/29/11 | 68 | U6B     | 26.020 | 26.019 | 26.018 | 26.019 | 0.289  | 26.308 |
| E365 | 6/29/11 | 70 | U6B     | 25.488 | 25.480 | 25.555 | 25.508 | 0.289  | 25.797 |
| E365 | 6/29/11 | 74 | U6B     | 25.908 | 25.775 | 25.798 | 25.827 | 0.289  | 26.116 |
| E365 | 6/29/11 | 75 | U6B     | 25.856 | 25.870 | 25.848 | 25.858 | 0.289  | 26.147 |
| E365 | 6/29/11 | 76 | U6B     | 25.063 | 24.928 | 24.834 | 24.942 | 0.289  | 25.231 |
| E365 | 6/29/11 | 77 | U6B     | 25.304 | 25.247 | 25.253 | 25.268 | 0.289  | 25.557 |
| E365 | 6/29/11 | 80 | U6B     | 25.758 | 25.425 | 25.411 | 25.531 | 0.289  | 25.820 |
| E365 | 6/29/11 | 6  | U6B     | 26.205 | 26.333 | 26.150 | 26.229 | 0.289  | 26.518 |
| E365 | 6/29/11 | 10 | U6B     | 26.309 | 26.295 | 26.118 | 26.241 | 0.289  | 26.530 |
| E365 | 6/29/11 | 46 | miR-21  | 20.716 | 20.486 | 20.562 | 20.588 | -0.847 | 19.741 |
| E365 | 6/29/11 | 48 | miR-21  | 21.471 | 21.330 | 21.404 | 21.402 | -0.847 | 20.555 |
| E365 | 6/29/11 | 49 | miR-21  | 19.514 | 19.516 | 19.406 | 19.478 | -0.847 | 18.631 |
| E365 | 6/29/11 | 51 | miR-21  | 20.686 | 20.861 | 20.811 | 20.786 | -0.847 | 19.939 |
| E365 | 6/29/11 | 53 | miR-21  | 20.931 | 21.162 | 20.948 | 21.014 | -0.847 | 20.167 |
| E365 | 6/29/11 | 54 | miR-21  | 20.053 | 20.394 | 20.074 | 20.174 | -0.847 | 19.327 |
| E365 | 6/29/11 | 56 | miR-21  | 19.391 | 19.303 | 19.352 | 19.348 | -0.847 | 18.501 |
| E365 | 6/29/11 | 57 | miR-21  | 22.703 | 22.566 | 22.658 | 22.642 | -0.847 | 21.795 |
| E365 | 6/29/11 | 60 | miR-21  | 22.312 | 22.135 | 22.224 | 22.224 | -0.847 | 21.377 |
| E365 | 6/29/11 | 62 | miR-21  | 22.867 | 22.705 | 22.823 | 22.798 | -0.847 | 21.951 |
| E365 | 6/29/11 | 64 | miR-21  | 21.457 | 21.540 | 21.351 | 21.449 | -0.847 | 20.602 |
| E365 | 6/29/11 | 67 | miR-21  | 23.544 | 23.480 | 23.565 | 23.530 | -0.847 | 22.683 |
| E365 | 6/29/11 | 68 | miR-21  | 19.954 | 19.926 | 19.933 | 19.938 | -0.847 | 19.091 |
| E365 | 6/29/11 | 70 | miR-21  | 19.737 | 19.743 | 19.681 | 19.720 | -0.847 | 18.873 |
| E365 | 6/29/11 | 74 | miR-21  | 21.733 | 21.584 | 21.353 | 21.557 | -0.847 | 20.710 |
| E365 | 6/29/11 | 75 | miR-21  | 19.741 | 19.644 | 19.623 | 19.669 | -0.847 | 18.822 |
| E365 | 6/29/11 | 76 | miR-21  | 20.206 | 20.163 | 20.083 | 20.151 | -0.847 | 19.304 |
| E365 | 6/29/11 | 77 | miR-21  | 19.952 | 19.804 | 20.134 | 19.963 | -0.847 | 19.116 |
| E365 | 6/29/11 | 80 | miR-21  | 21.401 | 21.475 | 21.470 | 21.449 | -0.847 | 20.602 |
| E365 | 6/29/11 | 6  | miR-21  | 20.847 | 20.812 | 20.643 | 20.767 | -0.847 | 19.920 |
| E365 | 6/29/11 | 10 | miR-21  | 22.509 | 22.501 | 22.439 | 22.483 | -0.847 | 21.636 |
| E365 | 6/29/11 | 46 | miR-205 | 24.507 | 24.376 | 24.404 | 24.429 | 0.324  | 24.753 |
| E365 | 6/29/11 | 48 | miR-205 | 20.963 | 20.959 | 20.888 | 20.937 | 0.324  | 21.261 |
| E365 | 6/29/11 | 49 | miR-205 | 19.010 | 19.304 | 19.393 | 19.236 | 0.324  | 19.560 |
| E365 | 6/29/11 | 51 | miR-205 | 28.255 | 28.318 | 28.539 | 28.371 | 0.324  | 28.695 |
| E365 | 6/29/11 | 53 | miR-205 | 27.692 | 27.248 | 27.545 | 27.495 | 0.324  | 27.819 |
| E365 | 6/29/11 | 54 | miR-205 | 28.189 | 27.897 | 27.949 | 28.011 | 0.324  | 28.335 |
| E365 | 6/29/11 | 56 | miR-205 | 30.652 | 30.166 | 30.235 | 30.351 | 0.324  | 30.675 |
| E365 | 6/29/11 | 57 | miR-205 | 21.518 | 21.389 | 21.493 | 21.467 | 0.324  | 21.791 |
| E365 | 6/29/11 | 60 | miR-205 | 25.911 | 26.138 | 26.029 | 26.026 | 0.324  | 26.350 |
| E365 | 6/29/11 | 62 | miR-205 | 23.556 | 23.428 | 23.486 | 23.490 | 0.324  | 23.814 |
| E365 | 6/29/11 | 64 | miR-205 | 31.754 | 31.635 | 32.297 | 31.895 | 0.324  | 32.219 |
| E365 | 6/29/11 | 67 | miR-205 | 28.354 | 28.187 | 28.206 | 28.249 | 0.324  | 28.573 |



|      |         |                    |         |        |        |        |        |        |        |
|------|---------|--------------------|---------|--------|--------|--------|--------|--------|--------|
| E365 | 6/29/11 | 68                 | miR-205 | 28.131 | 27.993 | 28.015 | 28.047 | 0.324  | 28.371 |
| E365 | 6/29/11 | 70                 | miR-205 | 23.216 | 22.959 | 23.083 | 23.086 | 0.324  | 23.410 |
| E365 | 6/29/11 | 74                 | miR-205 | 27.174 | 27.153 | 27.026 | 27.118 | 0.324  | 27.442 |
| E365 | 6/29/11 | 75                 | miR-205 | 30.004 | 29.966 | 29.725 | 29.899 | 0.324  | 30.223 |
| E365 | 6/29/11 | 76                 | miR-205 | 31.138 | 31.458 | 31.247 | 31.281 | 0.324  | 31.605 |
| E365 | 6/29/11 | 77                 | miR-205 | 35.839 | undet  | 35.710 | 35.774 | 0.324  | 36.098 |
| E365 | 6/29/11 | 80                 | miR-205 | 23.905 | 24.008 | 23.900 | 23.938 | 0.324  | 24.262 |
| E365 | 6/29/11 | 6                  | miR-205 | 27.922 | 28.143 | 27.909 | 27.992 | 0.324  | 28.316 |
| E365 | 6/29/11 | 10                 | miR-205 | 20.836 | 20.942 | 20.985 | 20.921 | 0.324  | 21.245 |
| E365 | 6/29/11 | U6B std., 10e4     | U6B     | undet  | 39.518 | 37.751 | 38.634 | 0.289  | 38.923 |
| E365 | 6/29/11 | U6B std., 10e7     | U6B     | 27.041 | 26.960 | 26.855 | 26.952 | 0.289  | 27.241 |
| E365 | 6/29/11 | U6B std., 10e7     | U6B     | 25.840 | 25.918 | 25.962 | 25.906 | 0.289  | 26.195 |
| E365 | 6/29/11 | miR-21 std., 10e2  | miR-21  | 30.646 | 30.916 | 30.809 | 30.790 | -0.847 | 29.943 |
| E365 | 6/29/11 | miR-21 std., 10e2  | miR-21  | 31.369 | 31.417 | 31.376 | 31.387 | -0.847 | 30.540 |
| E365 | 6/29/11 | miR-21 std., 10e5  | miR-21  | 26.773 | 26.931 | 26.756 | 26.820 | -0.847 | 25.973 |
| E365 | 6/29/11 | miR-21 std., 10e5  | miR-21  | 26.708 | 26.852 | 26.614 | 26.725 | -0.847 | 25.878 |
| E365 | 6/29/11 | miR-205 std., 10e2 | miR-205 | 31.019 | 31.250 | 31.911 | 31.393 | 0.324  | 31.717 |
| E365 | 6/29/11 | miR-205 std., 10e2 | miR-205 | 31.816 | 31.488 | 29.829 | 31.044 | 0.324  | 31.368 |
| E365 | 6/29/11 | miR-205 std., 10e5 | miR-205 | 26.266 | 26.152 | 26.032 | 26.150 | 0.324  | 26.474 |
| E365 | 6/29/11 | miR-205 std., 10e5 | miR-205 | 26.317 | 26.044 | 26.288 | 26.216 | 0.324  | 26.540 |
| E365 | 7/5/11  | 8                  | U6B     | 30.356 | 29.894 | 30.078 | 30.109 | 0.246  | 30.355 |
| E365 | 7/5/11  | 9                  | U6B     | 26.649 | 26.785 | 26.608 | 26.681 | 0.246  | 26.927 |
| E365 | 7/5/11  | 12                 | U6B     | 26.111 | 25.937 | 25.765 | 25.937 | 0.246  | 26.183 |
| E365 | 7/5/11  | 19                 | U6B     | 27.987 | 27.964 | 27.872 | 27.941 | 0.246  | 28.187 |
| E365 | 7/5/11  | 33                 | U6B     | 27.795 | 27.570 | 27.581 | 27.649 | 0.246  | 27.895 |
| E365 | 7/5/11  | 63                 | U6B     | 29.683 | 26.759 | 26.793 | 26.776 | 0.246  | 27.022 |
| E365 | 7/5/11  | 66                 | U6B     | 26.685 | 26.074 | 25.956 | 26.238 | 0.246  | 26.484 |
| E365 | 7/5/11  | 79                 | U6B     | 26.601 | 26.717 | 26.819 | 26.712 | 0.246  | 26.958 |
| E365 | 7/5/11  | 6                  | U6B     | 26.349 | 26.418 | 26.353 | 26.373 | 0.246  | 26.619 |
| E365 | 7/5/11  | 10                 | U6B     | 26.214 | 26.396 | 26.320 | 26.310 | 0.246  | 26.556 |
| E365 | 7/5/11  | 8                  | miR-21  | 22.259 | 22.013 | 21.836 | 22.036 | -1.209 | 20.827 |
| E365 | 7/5/11  | 9                  | miR-21  | 18.826 | 18.830 | 18.853 | 18.837 | -1.209 | 17.628 |
| E365 | 7/5/11  | 12                 | miR-21  | 20.689 | 20.799 | 20.503 | 20.664 | -1.209 | 19.455 |
| E365 | 7/5/11  | 19                 | miR-21  | 20.391 | 20.298 | 20.322 | 20.337 | -1.209 | 19.128 |
| E365 | 7/5/11  | 33                 | miR-21  | 19.998 | 19.871 | 19.987 | 19.952 | -1.209 | 18.743 |
| E365 | 7/5/11  | 63                 | miR-21  | 21.338 | 21.300 | 21.359 | 21.332 | -1.209 | 20.123 |
| E365 | 7/5/11  | 66                 | miR-21  | 21.360 | 20.962 | 21.055 | 21.125 | -1.209 | 19.916 |
| E365 | 7/5/11  | 79                 | miR-21  | 20.108 | 19.831 | 19.642 | 19.860 | -1.209 | 18.651 |
| E365 | 7/5/11  | 6                  | miR-21  | 20.635 | 20.915 | 20.650 | 20.733 | -1.209 | 19.524 |
| E365 | 7/5/11  | 10                 | miR-21  | 22.385 | 22.363 | 22.237 | 22.329 | -1.209 | 21.120 |
| E365 | 7/5/11  | 8                  | miR-205 | 22.013 | 22.011 | 22.039 | 22.021 | 0.511  | 22.532 |
| E365 | 7/5/11  | 9                  | miR-205 | 31.354 | 31.442 | 31.693 | 31.496 | 0.511  | 32.007 |
| E365 | 7/5/11  | 12                 | miR-205 | 33.009 | 31.483 | 32.538 | 32.343 | 0.511  | 32.854 |
| E365 | 7/5/11  | 19                 | miR-205 | 28.091 | 28.405 | 28.465 | 28.320 | 0.511  | 28.831 |
| E365 | 7/5/11  | 33                 | miR-205 | 29.072 | 29.417 | 28.998 | 29.162 | 0.511  | 29.673 |
| E365 | 7/5/11  | 63                 | miR-205 | 26.546 | 26.597 | 26.298 | 26.480 | 0.511  | 26.991 |
| E365 | 7/5/11  | 66                 | miR-205 | 20.983 | 20.861 | 20.778 | 20.874 | 0.511  | 21.385 |
| E365 | 7/5/11  | 79                 | miR-205 | 21.671 | 21.567 | 21.558 | 21.598 | 0.511  | 22.109 |
| E365 | 7/5/11  | 6                  | miR-205 | 27.980 | 27.797 | 27.728 | 27.835 | 0.511  | 28.346 |
| E365 | 7/5/11  | 10                 | miR-205 | 20.755 | 20.791 | 20.821 | 20.789 | 0.511  | 21.300 |
| E365 | 7/5/11  | U6B std., 10e4     | U6B     | 36.938 | 38.984 | undet  | 37.961 | 0.246  | 38.207 |
| E365 | 7/5/11  | U6B std., 10e7     | U6B     | 27.001 | 26.912 | 27.007 | 26.974 | 0.246  | 27.220 |

|      |          |                           |                |        |        |        |        |        |        |
|------|----------|---------------------------|----------------|--------|--------|--------|--------|--------|--------|
| E365 | 7/5/11   | <i>U6B</i> std., 10e7     | <i>U6B</i>     | 27.492 | 27.299 | 27.423 | 27.405 | 0.246  | 27.651 |
| E365 | 7/5/11   | <i>miR-21</i> std., 10e2  | <i>miR-21</i>  | 31.391 | 31.898 | 31.335 | 31.541 | -1.209 | 30.332 |
| E365 | 7/5/11   | <i>miR-21</i> std., 10e2  | <i>miR-21</i>  | 31.783 | 31.538 | 31.576 | 31.633 | -1.209 | 30.424 |
| E365 | 7/5/11   | <i>miR-21</i> std., 10e5  | <i>miR-21</i>  | 26.771 | 26.703 | 26.728 | 26.734 | -1.209 | 25.525 |
| E365 | 7/5/11   | <i>miR-21</i> std., 10e5  | <i>miR-21</i>  | 27.320 | 27.242 | 27.230 | 27.264 | -1.209 | 26.055 |
| E365 | 7/5/11   | <i>miR-205</i> std., 10e2 | <i>miR-205</i> | 31.264 | 31.155 | 30.974 | 31.131 | 0.511  | 31.642 |
| E365 | 7/5/11   | <i>miR-205</i> std., 10e2 | <i>miR-205</i> | 30.883 | 31.412 | 30.827 | 31.041 | 0.511  | 31.552 |
| E365 | 7/5/11   | <i>miR-205</i> std., 10e5 | <i>miR-205</i> | 25.859 | 26.044 | 25.829 | 25.911 | 0.511  | 26.422 |
| E365 | 7/5/11   | <i>miR-205</i> std., 10e5 | <i>miR-205</i> | 25.995 | 26.119 | 25.802 | 25.972 | 0.511  | 26.483 |
| E435 | 11/14/12 | D                         | <i>U6B</i>     | 31.954 | 32.108 | 32.047 | 32.037 | -0.041 | 31.996 |
| E435 | 11/14/12 | E                         | <i>U6B</i>     | 29.679 | 29.599 | 29.796 | 29.691 | -0.041 | 29.650 |
| E435 | 11/14/12 | F                         | <i>U6B</i>     | 38.633 | 35.018 | 36.056 | 35.537 | -0.041 | 35.496 |
| E435 | 11/14/12 | J                         | <i>U6B</i>     | 35.362 | 34.233 | 33.943 | 34.512 | -0.041 | 34.471 |
| E435 | 11/14/12 | K                         | <i>U6B</i>     | 34.967 | 33.795 | 34.607 | 34.456 | -0.041 | 34.415 |
| E435 | 11/14/12 | L                         | <i>U6B</i>     | 32.343 | 33.140 | 32.163 | 32.549 | -0.041 | 32.508 |
| E435 | 11/14/12 | M                         | <i>U6B</i>     | 32.749 | 32.948 | 32.547 | 32.748 | -0.041 | 32.707 |
| E435 | 11/14/12 | N                         | <i>U6B</i>     | 33.769 | 32.322 | 33.197 | 33.096 | -0.041 | 33.055 |
| E435 | 11/14/12 | O                         | <i>U6B</i>     | 31.623 | 31.046 | 31.088 | 31.252 | -0.041 | 31.211 |
| E435 | 11/14/12 | T                         | <i>U6B</i>     | 30.889 | 31.262 | 31.134 | 31.095 | -0.041 | 31.054 |
| E435 | 11/14/12 | U                         | <i>U6B</i>     | 32.119 | 32.007 | 32.000 | 32.042 | -0.041 | 32.001 |
| E435 | 11/14/12 | P                         | <i>U6B</i>     | 30.432 | 30.498 | 30.168 | 30.366 | -0.041 | 30.325 |
| E435 | 11/14/12 | Q                         | <i>U6B</i>     | 28.134 | 27.834 | 27.889 | 27.952 | -0.041 | 27.911 |
| E435 | 11/14/12 | R                         | <i>U6B</i>     | 33.348 | 33.377 | 33.641 | 33.455 | -0.041 | 33.414 |
| E435 | 11/14/12 | S                         | <i>U6B</i>     | 30.136 | 30.280 | 30.620 | 30.345 | -0.041 | 30.304 |
| E435 | 11/14/12 | W                         | <i>U6B</i>     | 28.690 | 28.654 | 28.619 | 28.654 | -0.041 | 28.613 |
| E435 | 11/14/12 | H                         | <i>U6B</i>     | 30.398 | 30.318 | 30.235 | 30.317 | -0.041 | 30.276 |
| E435 | 11/14/12 | G                         | <i>U6B</i>     | 28.616 | 28.734 | 28.519 | 28.623 | -0.041 | 28.582 |
| E435 | 11/14/12 | Y                         | <i>U6B</i>     | 28.927 | 28.909 | 28.977 | 28.938 | -0.041 | 28.897 |
| E435 | 11/14/12 | X                         | <i>U6B</i>     | 29.479 | 29.514 | 29.756 | 29.583 | -0.041 | 29.542 |
| E435 | 11/14/12 | V                         | <i>U6B</i>     | 27.478 | 27.552 | 27.569 | 27.533 | -0.041 | 27.492 |
| E435 | 11/14/12 | A                         | <i>U6B</i>     | 33.645 | 33.534 | 33.324 | 33.501 | -0.041 | 33.460 |
| E435 | 11/14/12 | B                         | <i>U6B</i>     | 29.731 | 29.866 | 29.852 | 29.816 | -0.041 | 29.775 |
| E435 | 11/14/12 | C                         | <i>U6B</i>     | 29.741 | 29.557 | 29.742 | 29.680 | -0.041 | 29.639 |
| E435 | 11/14/12 | D                         | <i>miR-21</i>  | 25.286 | 25.279 | 25.296 | 25.287 |        |        |
| E435 | 11/14/12 | E                         | <i>miR-21</i>  | 23.504 | 23.597 | 23.721 | 23.607 |        |        |
| E435 | 11/14/12 | F                         | <i>miR-21</i>  | 29.397 | 29.433 | 29.578 | 29.469 |        |        |
| E435 | 11/14/12 | J                         | <i>miR-21</i>  | 25.354 | 25.343 | 25.361 | 25.353 |        |        |
| E435 | 11/14/12 | K                         | <i>miR-21</i>  | 26.723 | 26.563 | 26.819 | 26.702 |        |        |
| E435 | 11/14/12 | L                         | <i>miR-21</i>  | 25.032 | 25.030 | 24.922 | 24.995 |        |        |
| E435 | 11/14/12 | M                         | <i>miR-21</i>  | 26.436 | 26.468 | 26.371 | 26.425 |        |        |
| E435 | 11/14/12 | N                         | <i>miR-21</i>  | 26.333 | 26.107 | 26.009 | 26.150 |        |        |
| E435 | 11/14/12 | O                         | <i>miR-21</i>  | 23.696 | 23.833 | 23.775 | 23.768 |        |        |
| E435 | 11/14/12 | T                         | <i>miR-21</i>  | 26.799 | 26.815 | 26.871 | 26.828 |        |        |
| E435 | 11/14/12 | U                         | <i>miR-21</i>  | 25.832 | 25.835 | 26.113 | 25.927 |        |        |
| E435 | 11/14/12 | P                         | <i>miR-21</i>  | 22.661 | 22.834 | 22.706 | 22.734 |        |        |
| E435 | 11/14/12 | Q                         | <i>miR-21</i>  | 24.350 | 24.360 | 24.575 | 24.429 |        |        |
| E435 | 11/14/12 | R                         | <i>miR-21</i>  | 26.555 | 26.514 | 26.564 | 26.545 |        |        |
| E435 | 11/14/12 | S                         | <i>miR-21</i>  | 24.350 | 24.358 | 24.091 | 24.266 |        |        |
| E435 | 11/14/12 | W                         | <i>miR-21</i>  | 23.415 | 23.475 | 23.431 | 23.440 |        |        |
| E435 | 11/14/12 | H                         | <i>miR-21</i>  | 24.615 | 24.725 | 24.848 | 24.730 |        |        |
| E435 | 11/14/12 | G                         | <i>miR-21</i>  | 23.878 | 23.783 | 23.877 | 23.846 |        |        |
| E435 | 11/14/12 | Y                         | <i>miR-21</i>  | 22.678 | 22.721 | 22.793 | 22.731 |        |        |

|      |          |                       |                |        |        |        |        |        |        |
|------|----------|-----------------------|----------------|--------|--------|--------|--------|--------|--------|
| E435 | 11/14/12 | X                     | <i>miR-21</i>  | 25.698 | 25.484 | 25.553 | 25.579 |        |        |
| E435 | 11/14/12 | V                     | <i>miR-21</i>  | 23.764 | 23.679 | 23.597 | 23.680 |        |        |
| E435 | 11/14/12 | A                     | <i>miR-21</i>  | 28.617 | 28.331 | 28.504 | 28.484 |        |        |
| E435 | 11/14/12 | B                     | <i>miR-21</i>  | undet  | undet  | undet  | undet  |        |        |
| E435 | 11/14/12 | C                     | <i>miR-21</i>  | 24.522 | 24.390 | 24.346 | 24.419 |        |        |
| E435 | 11/14/12 | <i>U6B</i> std., 10e5 | <i>U6B</i>     | 33.498 | 33.302 | 33.250 | 33.350 | -0.041 | 33.309 |
| E435 | 11/14/12 | <i>U6B</i> std., 10e5 | <i>U6B</i>     | 32.918 | 32.915 | 32.652 | 32.828 | -0.041 | 32.787 |
| E435 | 11/14/12 | <i>U6B</i> std., 10e7 | <i>U6B</i>     | 27.293 | 27.524 | 27.268 | 27.361 | -0.041 | 27.320 |
| E435 | 11/14/12 | <i>U6B</i> std., 10e7 | <i>U6B</i>     | 27.776 | 27.872 | 27.802 | 27.817 | -0.041 | 27.776 |
| E435 | 11/14/12 | D                     | <i>miR-205</i> | 27.426 | 27.266 | 27.204 | 27.299 | 0.376  | 27.675 |
| E435 | 11/14/12 | E                     | <i>miR-205</i> | 24.342 | 24.409 | 24.388 | 24.380 | 0.376  | 24.756 |
| E435 | 11/14/12 | F                     | <i>miR-205</i> | 32.986 | 32.781 | 32.612 | 32.793 | 0.376  | 33.169 |
| E435 | 11/14/12 | J                     | <i>miR-205</i> | 28.564 | 27.711 | 27.732 | 28.002 | 0.376  | 28.378 |
| E435 | 11/14/12 | K                     | <i>miR-205</i> | 29.304 | 28.977 | 29.307 | 29.196 | 0.376  | 29.572 |
| E435 | 11/14/12 | L                     | <i>miR-205</i> | 34.243 | 33.310 | undet  | 33.776 | 0.376  | 34.152 |
| E435 | 11/14/12 | M                     | <i>miR-205</i> | 35.528 | undet  | 36.426 | 35.977 | 0.376  | 36.353 |
| E435 | 11/14/12 | N                     | <i>miR-205</i> | 27.672 | 27.593 | 27.459 | 27.574 | 0.376  | 27.950 |
| E435 | 11/14/12 | O                     | <i>miR-205</i> | 27.702 | 27.545 | 27.427 | 27.558 | 0.376  | 27.934 |
| E435 | 11/14/12 | T                     | <i>miR-205</i> | 26.795 | 26.478 | 26.465 | 26.579 | 0.376  | 26.955 |
| E435 | 11/14/12 | U                     | <i>miR-205</i> | 26.690 | 27.224 | 27.139 | 27.017 | 0.376  | 27.393 |
| E435 | 11/14/12 | P                     | <i>miR-205</i> | 30.527 | 30.698 | 30.591 | 30.605 | 0.376  | 30.981 |
| E435 | 11/14/12 | Q                     | <i>miR-205</i> | 23.872 | 23.926 | 23.976 | 23.925 | 0.376  | 24.301 |
| E435 | 11/14/12 | R                     | <i>miR-205</i> | 27.731 | 27.566 | 27.706 | 27.668 | 0.376  | 28.044 |
| E435 | 11/14/12 | S                     | <i>miR-205</i> | undet  | undet  | undet  | undet  | 0.376  | undet  |
| E435 | 11/14/12 | W                     | <i>miR-205</i> | 24.272 | 24.140 | 24.281 | 24.231 | 0.376  | 24.607 |
| E435 | 11/14/12 | H                     | <i>miR-205</i> | 32.418 | 33.658 | 32.603 | 32.893 | 0.376  | 33.269 |
| E435 | 11/14/12 | G                     | <i>miR-205</i> | 24.546 | 24.741 | 24.557 | 24.615 | 0.376  | 24.991 |
| E435 | 11/14/12 | Y                     | <i>miR-205</i> | 32.859 | 33.437 | 32.595 | 32.964 | 0.376  | 33.340 |
| E435 | 11/14/12 | X                     | <i>miR-205</i> | 26.482 | 26.419 | 26.363 | 26.422 | 0.376  | 26.798 |
| E435 | 11/14/12 | V                     | <i>miR-205</i> | 22.963 | 22.959 | 23.100 | 23.007 | 0.376  | 23.383 |
| E435 | 11/14/12 | A                     | <i>miR-205</i> | 33.920 | 32.424 | 33.486 | 33.277 | 0.376  | 33.653 |
| E435 | 11/14/12 | B                     | <i>miR-205</i> | 29.876 | 29.811 | 29.384 | 29.690 | 0.376  | 30.066 |
| E435 | 11/14/12 | C                     | <i>miR-205</i> | 33.742 | 33.155 | 33.261 | 33.386 | 0.376  | 33.762 |
| E435 | 11/14/12 | D                     | <i>miR-375</i> | 29.522 | 29.388 | 29.570 | 29.493 | -0.176 | 29.317 |
| E435 | 11/14/12 | E                     | <i>miR-375</i> | 30.809 | 30.643 | 30.619 | 30.690 | -0.176 | 30.514 |
| E435 | 11/14/12 | F                     | <i>miR-375</i> | 32.546 | 32.246 | 32.605 | 32.465 | -0.176 | 32.289 |
| E435 | 11/14/12 | J                     | <i>miR-375</i> | 31.203 | 30.814 | 31.482 | 31.166 | -0.176 | 30.990 |
| E435 | 11/14/12 | K                     | <i>miR-375</i> | 29.296 | 29.382 | 29.282 | 29.320 | -0.176 | 29.144 |
| E435 | 11/14/12 | L                     | <i>miR-375</i> | 27.402 | 27.537 | 27.605 | 27.515 | -0.176 | 27.339 |
| E435 | 11/14/12 | M                     | <i>miR-375</i> | 33.104 | 26.004 | 26.068 | 26.036 | -0.176 | 25.860 |
| E435 | 11/14/12 | N                     | <i>miR-375</i> | 29.560 | 29.759 | 29.799 | 29.706 | -0.176 | 29.530 |
| E435 | 11/14/12 | O                     | <i>miR-375</i> | 28.223 | 27.903 | 28.123 | 28.083 | -0.176 | 27.907 |
| E435 | 11/14/12 | T                     | <i>miR-375</i> | 24.711 | 25.255 | 24.559 | 24.841 | -0.176 | 24.665 |
| E435 | 11/14/12 | U                     | <i>miR-375</i> | 28.604 | 28.794 | 29.005 | 28.801 | -0.176 | 28.625 |
| E435 | 11/14/12 | P                     | <i>miR-375</i> | 28.940 | 29.340 | 29.440 | 29.240 | -0.176 | 29.064 |
| E435 | 11/14/12 | Q                     | <i>miR-375</i> | 30.309 | 30.722 | 30.168 | 30.400 | -0.176 | 30.224 |
| E435 | 11/14/12 | R                     | <i>miR-375</i> | 28.850 | 28.750 | 29.162 | 28.921 | -0.176 | 28.745 |
| E435 | 11/14/12 | S                     | <i>miR-375</i> | 29.161 | 29.339 | 29.273 | 29.258 | -0.176 | 29.082 |
| E435 | 11/14/12 | W                     | <i>miR-375</i> | 28.505 | 28.440 | 28.520 | 28.488 | -0.176 | 28.312 |
| E435 | 11/14/12 | H                     | <i>miR-375</i> | 27.229 | 27.205 | 27.282 | 27.239 | -0.176 | 27.063 |
| E435 | 11/14/12 | G                     | <i>miR-375</i> | 28.367 | 27.975 | 28.287 | 28.210 | -0.176 | 28.034 |
| E435 | 11/14/12 | Y                     | <i>miR-375</i> | 26.769 | 26.568 | 26.672 | 26.670 | -0.176 | 26.494 |

|      |          |                           |                |        |        |        |        |        |        |
|------|----------|---------------------------|----------------|--------|--------|--------|--------|--------|--------|
| E435 | 11/14/12 | X                         | <i>miR-375</i> | 26.533 | 26.378 | 26.375 | 26.429 | -0.176 | 26.253 |
| E435 | 11/14/12 | V                         | <i>miR-375</i> | 28.774 | 28.741 | 28.685 | 28.733 | -0.176 | 28.557 |
| E435 | 11/14/12 | A                         | <i>miR-375</i> | 27.196 | 27.089 | 27.246 | 27.177 | -0.176 | 27.001 |
| E435 | 11/14/12 | B                         | <i>miR-375</i> | 30.842 | 30.793 | 31.378 | 31.005 | -0.176 | 30.829 |
| E435 | 11/14/12 | C                         | <i>miR-375</i> | 28.099 | 28.544 | 28.377 | 28.340 | -0.176 | 28.164 |
| E435 | 11/14/12 | <i>miR-205</i> std., 10e5 | <i>miR-205</i> | 26.018 | 25.922 | 26.012 | 25.984 | 0.376  | 26.360 |
| E435 | 11/14/12 | <i>miR-205</i> std., 10e5 | <i>miR-205</i> | 26.076 | 26.326 | 26.194 | 26.199 | 0.376  | 26.575 |
| E435 | 11/14/12 | <i>miR-375</i> std., 10e3 | <i>miR-375</i> | 23.977 | 24.001 | 24.219 | 24.066 | -0.176 | 23.890 |
| E435 | 11/14/12 | <i>miR-375</i> std., 10e3 | <i>miR-375</i> | 23.769 | 23.917 | 23.987 | 23.891 | -0.176 | 23.715 |
| E435 | 11/14/12 | <i>miR-375</i> std., 10e5 | <i>miR-375</i> | 22.040 | 22.203 | 22.169 | 22.137 | -0.176 | 21.961 |
| E435 | 11/14/12 | <i>miR-375</i> std., 10e5 | <i>miR-375</i> | 22.263 | 21.948 | 21.895 | 22.035 | -0.176 | 21.859 |
| E436 | 11/15/12 | 5                         | <i>U6B</i>     | 24.714 | 24.568 | 24.526 | 24.603 | -0.045 | 24.558 |
| E436 | 11/15/12 | 7                         | <i>U6B</i>     | 25.553 | 25.423 | 25.246 | 25.407 | -0.045 | 25.362 |
| E436 | 11/15/12 | 13                        | <i>U6B</i>     | 26.756 | 26.781 | 26.921 | 26.819 | -0.045 | 26.774 |
| E436 | 11/15/12 | 15                        | <i>U6B</i>     | 27.546 | 27.291 | 27.377 | 27.405 | -0.045 | 27.360 |
| E436 | 11/15/12 | 16                        | <i>U6B</i>     | 27.179 | 27.141 | 26.909 | 27.077 | -0.045 | 27.032 |
| E436 | 11/15/12 | 28                        | <i>U6B</i>     | 24.135 | 24.152 | 24.243 | 24.177 | -0.045 | 24.132 |
| E436 | 11/15/12 | 29                        | <i>U6B</i>     | 25.009 | 24.992 | 24.994 | 24.998 | -0.045 | 24.953 |
| E436 | 11/15/12 | 35                        | <i>U6B</i>     | 25.572 | 25.677 | 25.491 | 25.580 | -0.045 | 25.535 |
| E436 | 11/15/12 | 43                        | <i>U6B</i>     | 25.468 | 25.493 | 25.506 | 25.489 | -0.045 | 25.444 |
| E436 | 11/15/12 | 44                        | <i>U6B</i>     | 24.199 | 24.055 | 24.101 | 24.118 | -0.045 | 24.073 |
| E436 | 11/15/12 | 45                        | <i>U6B</i>     | 25.665 | 25.640 | 25.599 | 25.635 | -0.045 | 25.590 |
| E436 | 11/15/12 | 47                        | <i>U6B</i>     | 24.644 | 24.802 | 24.769 | 24.738 | -0.045 | 24.693 |
| E436 | 11/15/12 | 50                        | <i>U6B</i>     | 24.611 | 24.743 | 24.624 | 24.660 | -0.045 | 24.615 |
| E436 | 11/15/12 | 52                        | <i>U6B</i>     | 24.902 | 24.928 | 24.825 | 24.885 | -0.045 | 24.840 |
| E436 | 11/15/12 | 55                        | <i>U6B</i>     | 24.811 | 24.803 | 24.759 | 24.791 | -0.045 | 24.746 |
| E436 | 11/15/12 | 58                        | <i>U6B</i>     | 27.268 | 27.317 | 27.319 | 27.301 | -0.045 | 27.256 |
| E436 | 11/15/12 | 59                        | <i>U6B</i>     | 30.827 | 31.454 | 31.038 | 31.106 | -0.045 | 31.061 |
| E436 | 11/15/12 | 61                        | <i>U6B</i>     | 26.720 | 26.608 | 26.738 | 26.689 | -0.045 | 26.644 |
| E436 | 11/15/12 | 65                        | <i>U6B</i>     | 25.728 | 25.611 | 25.530 | 25.623 | -0.045 | 25.578 |
| E436 | 11/15/12 | 71                        | <i>U6B</i>     | 27.640 | 27.620 | 27.481 | 27.580 | -0.045 | 27.535 |
| E436 | 11/15/12 | 78                        | <i>U6B</i>     | 24.855 | 24.893 | 24.847 | 24.865 | -0.045 | 24.820 |
| E436 | 11/15/12 | 6                         | <i>U6B</i>     | 25.352 | 25.381 | 25.287 | 25.340 | -0.045 | 25.295 |
| E436 | 11/15/12 | 10                        | <i>U6B</i>     | 26.077 | 26.028 | 25.925 | 26.010 | -0.045 | 25.965 |
| E436 | 11/15/12 | 1                         | <i>U6B</i>     | 33.521 | 34.059 | 35.425 | 34.335 | -0.045 | 34.290 |
| E436 | 11/15/12 | 5                         | <i>miR-21</i>  | 15.741 | 15.521 | 15.761 | 15.674 |        |        |
| E436 | 11/15/12 | 7                         | <i>miR-21</i>  | 17.391 | 17.404 | 17.305 | 17.367 |        |        |
| E436 | 11/15/12 | 13                        | <i>miR-21</i>  | 18.750 | 18.888 | 18.739 | 18.792 |        |        |
| E436 | 11/15/12 | 15                        | <i>miR-21</i>  | 18.847 | 18.661 | 18.745 | 18.751 |        |        |
| E436 | 11/15/12 | 16                        | <i>miR-21</i>  | 17.851 | 18.153 | 18.188 | 18.064 |        |        |
| E436 | 11/15/12 | 28                        | <i>miR-21</i>  | 18.417 | 18.378 | 18.469 | 18.422 |        |        |
| E436 | 11/15/12 | 29                        | <i>miR-21</i>  | 18.863 | 18.799 | 18.821 | 18.828 |        |        |
| E436 | 11/15/12 | 35                        | <i>miR-21</i>  | 19.172 | 19.240 | 18.906 | 19.106 |        |        |
| E436 | 11/15/12 | 43                        | <i>miR-21</i>  | 16.951 | 17.009 | 16.923 | 16.961 |        |        |
| E436 | 11/15/12 | 44                        | <i>miR-21</i>  | 18.537 | 18.518 | 18.658 | 18.571 |        |        |
| E436 | 11/15/12 | 45                        | <i>miR-21</i>  | 18.894 | 18.813 | 18.784 | 18.830 |        |        |
| E436 | 11/15/12 | 47                        | <i>miR-21</i>  | 16.579 | 16.751 | 16.500 | 16.610 |        |        |
| E436 | 11/15/12 | 50                        | <i>miR-21</i>  | 18.594 | 18.491 | 18.528 | 18.538 |        |        |
| E436 | 11/15/12 | 52                        | <i>miR-21</i>  | 19.871 | 19.956 | 19.650 | 19.825 |        |        |
| E436 | 11/15/12 | 55                        | <i>miR-21</i>  | 18.328 | 18.288 | 18.264 | 18.293 |        |        |
| E436 | 11/15/12 | 58                        | <i>miR-21</i>  | 19.401 | 19.337 | 19.328 | 19.355 |        |        |
| E436 | 11/15/12 | 59                        | <i>miR-21</i>  | 24.233 | 24.181 | 23.996 | 24.137 |        |        |

|      |          |    |         |        |        |        |        |       |        |
|------|----------|----|---------|--------|--------|--------|--------|-------|--------|
| E436 | 11/15/12 | 61 | miR-21  | 24.299 | 24.285 | 24.204 | 24.263 |       |        |
| E436 | 11/15/12 | 65 | miR-21  | 23.967 | 23.981 | 23.945 | 23.964 |       |        |
| E436 | 11/15/12 | 71 | miR-21  | 24.868 | 24.628 | 24.719 | 24.738 |       |        |
| E436 | 11/15/12 | 78 | miR-21  | 18.634 | 18.420 | 18.598 | 18.551 |       |        |
| E436 | 11/15/12 | 6  | miR-21  | 20.676 | 20.884 | 20.949 | 20.836 |       |        |
| E436 | 11/15/12 | 10 | miR-21  | 22.416 | 22.434 | 22.354 | 22.401 |       |        |
| E436 | 11/15/12 | 1  | miR-21  | 28.993 | 28.947 | 29.267 | 29.069 |       |        |
| E436 | 11/15/12 | 5  | miR-205 | 30.550 | 29.983 | 30.024 | 30.186 | 0.093 | 30.279 |
| E436 | 11/15/12 | 7  | miR-205 | 26.305 | 26.306 | 26.319 | 26.310 | 0.093 | 26.403 |
| E436 | 11/15/12 | 13 | miR-205 | 29.555 | 29.734 | 29.565 | 29.618 | 0.093 | 29.711 |
| E436 | 11/15/12 | 15 | miR-205 | 24.465 | 24.413 | 24.379 | 24.419 | 0.093 | 24.512 |
| E436 | 11/15/12 | 16 | miR-205 | 28.276 | 28.335 | 28.434 | 28.348 | 0.093 | 28.441 |
| E436 | 11/15/12 | 28 | miR-205 | 30.774 | 30.418 | 30.860 | 30.684 | 0.093 | 30.777 |
| E436 | 11/15/12 | 29 | miR-205 | 24.933 | 25.188 | 25.140 | 25.087 | 0.093 | 25.180 |
| E436 | 11/15/12 | 35 | miR-205 | 27.319 | 27.631 | 26.866 | 27.272 | 0.093 | 27.365 |
| E436 | 11/15/12 | 43 | miR-205 | 24.202 | 24.170 | 23.908 | 24.093 | 0.093 | 24.186 |
| E436 | 11/15/12 | 44 | miR-205 | 21.485 | 21.555 | 21.445 | 21.495 | 0.093 | 21.588 |
| E436 | 11/15/12 | 45 | miR-205 | 31.486 | 31.635 | 31.954 | 31.692 | 0.093 | 31.785 |
| E436 | 11/15/12 | 47 | miR-205 | 21.948 | 22.101 | 21.855 | 21.968 | 0.093 | 22.061 |
| E436 | 11/15/12 | 50 | miR-205 | 29.826 | 30.152 | 30.262 | 30.080 | 0.093 | 30.173 |
| E436 | 11/15/12 | 52 | miR-205 | 21.478 | 21.473 | 21.451 | 21.467 | 0.093 | 21.560 |
| E436 | 11/15/12 | 55 | miR-205 | 17.928 | 17.725 | 17.700 | 17.784 | 0.093 | 17.877 |
| E436 | 11/15/12 | 58 | miR-205 | 31.973 | 31.479 | 32.595 | 32.016 | 0.093 | 32.109 |
| E436 | 11/15/12 | 59 | miR-205 | 33.585 | 33.203 | 33.147 | 33.311 | 0.093 | 33.404 |
| E436 | 11/15/12 | 61 | miR-205 | 22.855 | 22.630 | 22.730 | 22.738 | 0.093 | 22.831 |
| E436 | 11/15/12 | 65 | miR-205 | 30.728 | 30.358 | 30.475 | 30.520 | 0.093 | 30.613 |
| E436 | 11/15/12 | 71 | miR-205 | 24.982 | 24.930 | 24.922 | 24.945 | 0.093 | 25.038 |
| E436 | 11/15/12 | 78 | miR-205 | 24.820 | 24.582 | 24.818 | 24.740 | 0.093 | 24.833 |
| E436 | 11/15/12 | 6  | miR-205 | 27.667 | 27.643 | 27.846 | 27.718 | 0.093 | 27.811 |
| E436 | 11/15/12 | 10 | miR-205 | 20.953 | 20.900 | 20.941 | 20.931 | 0.093 | 21.024 |
| E436 | 11/15/12 | 1  | miR-205 | 30.245 | 30.280 | 30.216 | 30.247 | 0.093 | 30.340 |
| E436 | 11/15/12 | 5  | miR-375 | 21.852 | 21.670 | 21.666 | 21.729 | 0.174 | 21.903 |
| E436 | 11/15/12 | 7  | miR-375 | 23.314 | 23.310 | 23.253 | 23.292 | 0.174 | 23.466 |
| E436 | 11/15/12 | 13 | miR-375 | 23.623 | 23.469 | 23.436 | 23.509 | 0.174 | 23.683 |
| E436 | 11/15/12 | 15 | miR-375 | 26.606 | 26.830 | 26.686 | 26.707 | 0.174 | 26.881 |
| E436 | 11/15/12 | 16 | miR-375 | 26.690 | 26.665 | 26.583 | 26.646 | 0.174 | 26.820 |
| E436 | 11/15/12 | 28 | miR-375 | 27.791 | 27.870 | 27.571 | 27.744 | 0.174 | 27.918 |
| E436 | 11/15/12 | 29 | miR-375 | 26.002 | 25.732 | 25.819 | 25.851 | 0.174 | 26.025 |
| E436 | 11/15/12 | 35 | miR-375 | 26.851 | 26.763 | 27.001 | 26.871 | 0.174 | 27.045 |
| E436 | 11/15/12 | 43 | miR-375 | 22.353 | 22.356 | 22.289 | 22.333 | 0.174 | 22.507 |
| E436 | 11/15/12 | 44 | miR-375 | 25.738 | 25.727 | 25.897 | 25.787 | 0.174 | 25.961 |
| E436 | 11/15/12 | 45 | miR-375 | 26.734 | 26.770 | 26.862 | 26.789 | 0.174 | 26.963 |
| E436 | 11/15/12 | 47 | miR-375 | 22.194 | 21.915 | 21.940 | 22.017 | 0.174 | 22.191 |
| E436 | 11/15/12 | 50 | miR-375 | 21.798 | 21.840 | 21.835 | 21.824 | 0.174 | 21.998 |
| E436 | 11/15/12 | 52 | miR-375 | 21.720 | 21.974 | 21.905 | 21.866 | 0.174 | 22.040 |
| E436 | 11/15/12 | 55 | miR-375 | 25.813 | 25.914 | 25.916 | 25.881 | 0.174 | 26.055 |
| E436 | 11/15/12 | 58 | miR-375 | 21.500 | 21.485 | 21.385 | 21.457 | 0.174 | 21.631 |
| E436 | 11/15/12 | 59 | miR-375 | 25.806 | 25.976 | 26.010 | 25.930 | 0.174 | 26.104 |
| E436 | 11/15/12 | 61 | miR-375 | 27.903 | 27.928 | 27.954 | 27.928 | 0.174 | 28.102 |
| E436 | 11/15/12 | 65 | miR-375 | 26.201 | 26.146 | 26.338 | 26.228 | 0.174 | 26.402 |
| E436 | 11/15/12 | 71 | miR-375 | 29.457 | 29.444 | 29.363 | 29.421 | 0.174 | 29.595 |
| E436 | 11/15/12 | 78 | miR-375 | 24.477 | 23.992 | 24.397 | 24.288 | 0.174 | 24.462 |

|      |          |                           |                |        |        |        |        |        |        |
|------|----------|---------------------------|----------------|--------|--------|--------|--------|--------|--------|
| E436 | 11/15/12 | 6                         | <i>miR-375</i> | 23.481 | 23.391 | 23.305 | 23.392 | 0.174  | 23.566 |
| E436 | 11/15/12 | 10                        | <i>miR-375</i> | 27.813 | 27.806 | 27.817 | 27.812 | 0.174  | 27.986 |
| E436 | 11/15/12 | l                         | <i>miR-375</i> | 30.227 | 30.494 | 30.587 | 30.436 | 0.174  | 30.610 |
| E436 | 11/15/12 | <i>U6B</i> std., 10e5     | <i>U6B</i>     | 33.016 | 32.975 | 32.962 | 32.984 | -0.045 | 32.939 |
| E436 | 11/15/12 | <i>U6B</i> std., 10e5     | <i>U6B</i>     | 33.727 | 34.021 | 32.924 | 33.557 | -0.045 | 33.512 |
| E436 | 11/15/12 | <i>U6B</i> std., 10e7     | <i>U6B</i>     | 27.324 | 27.513 | 27.342 | 27.393 | -0.045 | 27.348 |
| E436 | 11/15/12 | <i>U6B</i> std., 10e7     | <i>U6B</i>     | 27.427 | 27.363 | 27.524 | 27.438 | -0.045 | 27.393 |
| E436 | 11/15/12 | <i>miR-205</i> std., 10e5 | <i>miR-205</i> | 26.303 | 26.393 | 26.315 | 26.337 | 0.093  | 26.430 |
| E436 | 11/15/12 | <i>miR-205</i> std., 10e5 | <i>miR-205</i> | 26.429 | 26.405 | 26.398 | 26.411 | 0.093  | 26.504 |
| E436 | 11/15/12 | <i>miR-375</i> std., 10e3 | <i>miR-375</i> | 23.735 | 23.646 | 23.767 | 23.716 | 0.174  | 23.890 |
| E436 | 11/15/12 | <i>miR-375</i> std., 10e3 | <i>miR-375</i> | 23.569 | 23.639 | 23.691 | 23.633 | 0.174  | 23.807 |
| E436 | 11/15/12 | <i>miR-375</i> std., 10e5 | <i>miR-375</i> | 21.645 | 21.597 | 21.661 | 21.635 | 0.174  | 21.809 |
| E436 | 11/15/12 | <i>miR-375</i> std., 10e5 | <i>miR-375</i> | 21.728 | 21.720 | 21.787 | 21.745 | 0.174  | 21.919 |
| E437 | 11/20/12 | 1 (200 ng)                | <i>U6B</i>     | 35.881 | 36.732 | 35.729 | 36.114 | -0.381 | 35.733 |
| E437 | 11/20/12 | 2 (200 ng)                | <i>U6B</i>     | 33.933 | 34.532 | 34.180 | 34.215 | -0.381 | 33.834 |
| E437 | 11/20/12 | 3 (200 ng)                | <i>U6B</i>     | 34.092 | 34.522 | 34.755 | 34.456 | -0.381 | 34.075 |
| E437 | 11/20/12 | 4 (200 ng)                | <i>U6B</i>     | 33.750 | 32.875 | 33.338 | 33.321 | -0.381 | 32.940 |
| E437 | 11/20/12 | 6 (200 ng)                | <i>U6B</i>     | 32.660 | 32.532 | 33.822 | 33.005 | -0.381 | 32.624 |
| E437 | 11/20/12 | 10 (200 ng)               | <i>U6B</i>     | 32.903 | 32.485 | 33.278 | 32.889 | -0.381 | 32.508 |
| E437 | 11/20/12 | 11 (200 ng)               | <i>U6B</i>     | 33.801 | 34.213 | 34.135 | 34.050 | -0.381 | 33.669 |
| E437 | 11/20/12 | 14 (200 ng)               | <i>U6B</i>     | 32.860 | 32.595 | 32.562 | 32.673 | -0.381 | 32.292 |
| E437 | 11/20/12 | 17 (200 ng)               | <i>U6B</i>     | 31.850 | 32.483 | 32.113 | 32.148 | -0.381 | 31.767 |
| E437 | 11/20/12 | 18 (200 ng)               | <i>U6B</i>     | 32.380 | 32.316 | 32.430 | 32.375 | -0.381 | 31.994 |
| E437 | 11/20/12 | 20 (200 ng)               | <i>U6B</i>     | 31.953 | 31.735 | 31.824 | 31.837 | -0.381 | 31.456 |
| E437 | 11/20/12 | 21 (200 ng)               | <i>U6B</i>     | 33.838 | 34.134 | 33.930 | 33.967 | -0.381 | 33.586 |
| E437 | 11/20/12 | 22 (200 ng)               | <i>U6B</i>     | 32.814 | 32.345 | 32.678 | 32.612 | -0.381 | 32.231 |
| E437 | 11/20/12 | 23 (200 ng)               | <i>U6B</i>     | 31.849 | 31.751 | 31.905 | 31.835 | -0.381 | 31.454 |
| E437 | 11/20/12 | 24 (200 ng)               | <i>U6B</i>     | 31.922 | 32.148 | 31.457 | 31.842 | -0.381 | 31.461 |
| E437 | 11/20/12 | 1 (200 ng)                | <i>miR-21</i>  | 28.798 | 28.922 | 28.785 | 28.835 |        |        |
| E437 | 11/20/12 | 2 (200 ng)                | <i>miR-21</i>  | 29.805 | 29.360 | 29.701 | 29.622 |        |        |
| E437 | 11/20/12 | 3 (200 ng)                | <i>miR-21</i>  | 30.203 | 30.226 | 29.786 | 30.072 |        |        |
| E437 | 11/20/12 | 4 (200 ng)                | <i>miR-21</i>  | 28.450 | 28.025 | 28.379 | 28.285 |        |        |
| E437 | 11/20/12 | 6 (200 ng)                | <i>miR-21</i>  | 27.547 | 27.621 | 27.738 | 27.635 |        |        |
| E437 | 11/20/12 | 10 (200 ng)               | <i>miR-21</i>  | 29.850 | 29.579 | 29.719 | 29.716 |        |        |
| E437 | 11/20/12 | 11 (200 ng)               | <i>miR-21</i>  | 28.680 | 28.888 | 28.712 | 28.760 |        |        |
| E437 | 11/20/12 | 14 (200 ng)               | <i>miR-21</i>  | 27.397 | 27.272 | 27.367 | 27.346 |        |        |
| E437 | 11/20/12 | 17 (200 ng)               | <i>miR-21</i>  | 26.600 | 26.572 | 26.656 | 26.609 |        |        |
| E437 | 11/20/12 | 18 (200 ng)               | <i>miR-21</i>  | 27.954 | 27.876 | 27.824 | 27.884 |        |        |
| E437 | 11/20/12 | 20 (200 ng)               | <i>miR-21</i>  | 26.936 | 26.724 | 26.993 | 26.884 |        |        |
| E437 | 11/20/12 | 21 (200 ng)               | <i>miR-21</i>  | 29.765 | 30.204 | 29.909 | 29.959 |        |        |
| E437 | 11/20/12 | 22 (200 ng)               | <i>miR-21</i>  | 26.936 | 26.688 | 26.914 | 26.846 |        |        |
| E437 | 11/20/12 | 23 (200 ng)               | <i>miR-21</i>  | 28.601 | 28.784 | 28.705 | 28.696 |        |        |
| E437 | 11/20/12 | 24 (200 ng)               | <i>miR-21</i>  | 27.532 | 27.474 | 27.438 | 27.481 |        |        |
| E437 | 11/20/12 | 1 (200 ng)                | <i>miR-205</i> | 36.711 | undet  | 35.852 | 36.281 | 0.438  | 36.719 |
| E437 | 11/20/12 | 2 (200 ng)                | <i>miR-205</i> | 33.265 | 35.060 | 32.684 | 32.974 | 0.438  | 33.412 |
| E437 | 11/20/12 | 3 (200 ng)                | <i>miR-205</i> | 34.217 | 34.849 | 36.144 | 35.070 | 0.438  | 35.508 |
| E437 | 11/20/12 | 4 (200 ng)                | <i>miR-205</i> | 31.389 | 31.712 | 31.768 | 31.623 | 0.438  | 32.061 |
| E437 | 11/20/12 | 6 (200 ng)                | <i>miR-205</i> | 33.772 | 34.177 | 33.982 | 33.977 | 0.438  | 34.415 |
| E437 | 11/20/12 | 10 (200 ng)               | <i>miR-205</i> | 28.160 | 28.098 | 27.954 | 28.070 | 0.438  | 28.508 |
| E437 | 11/20/12 | 11 (200 ng)               | <i>miR-205</i> | 27.744 | 27.775 | 27.864 | 27.794 | 0.438  | 28.232 |
| E437 | 11/20/12 | 14 (200 ng)               | <i>miR-205</i> | 34.026 | 33.262 | 34.222 | 33.837 | 0.438  | 34.275 |
| E437 | 11/20/12 | 17 (200 ng)               | <i>miR-205</i> | 26.243 | 26.398 | 26.294 | 26.311 | 0.438  | 26.749 |

|      |          |                           |                |        |        |        |        |        |        |
|------|----------|---------------------------|----------------|--------|--------|--------|--------|--------|--------|
| E437 | 11/20/12 | 18 (200 ng)               | <i>miR-205</i> | 30.220 | 30.129 | 29.917 | 30.089 | 0.438  | 30.527 |
| E437 | 11/20/12 | 20 (200 ng)               | <i>miR-205</i> | 33.918 | undet  | 36.706 | 35.312 | 0.438  | 35.750 |
| E437 | 11/20/12 | 21 (200 ng)               | <i>miR-205</i> | 33.131 | 34.799 | 33.033 | 33.654 | 0.438  | 34.092 |
| E437 | 11/20/12 | 22 (200 ng)               | <i>miR-205</i> | 27.638 | 27.219 | 27.393 | 27.417 | 0.438  | 27.855 |
| E437 | 11/20/12 | 23 (200 ng)               | <i>miR-205</i> | 27.817 | 28.207 | 27.969 | 27.997 | 0.438  | 28.435 |
| E437 | 11/20/12 | 24 (200 ng)               | <i>miR-205</i> | undet  | undet  | undet  | undet  | 0.438  | undet  |
| E437 | 11/20/12 | 1 (200 ng)                | <i>miR-375</i> | 31.266 | 31.820 | 30.962 | 31.349 | 0.109  | 31.458 |
| E437 | 11/20/12 | 2 (200 ng)                | <i>miR-375</i> | 31.933 | 31.622 | 31.780 | 31.779 | 0.109  | 31.888 |
| E437 | 11/20/12 | 3 (200 ng)                | <i>miR-375</i> | 34.672 | 34.742 | 32.624 | 33.648 | 0.109  | 33.757 |
| E437 | 11/20/12 | 4 (200 ng)                | <i>miR-375</i> | 29.999 | 29.847 | 29.962 | 29.936 | 0.109  | 30.045 |
| E437 | 11/20/12 | 6 (200 ng)                | <i>miR-375</i> | 29.269 | 29.717 | 29.848 | 29.611 | 0.109  | 29.720 |
| E437 | 11/20/12 | 10 (200 ng)               | <i>miR-375</i> | 35.732 | 34.595 | 34.352 | 34.893 | 0.109  | 35.002 |
| E437 | 11/20/12 | 11 (200 ng)               | <i>miR-375</i> | 33.832 | 33.349 | 33.614 | 33.599 | 0.109  | 33.708 |
| E437 | 11/20/12 | 14 (200 ng)               | <i>miR-375</i> | 32.613 | 32.276 | 33.376 | 32.755 | 0.109  | 32.864 |
| E437 | 11/20/12 | 17 (200 ng)               | <i>miR-375</i> | 33.444 | 34.878 | 33.986 | 34.103 | 0.109  | 34.212 |
| E437 | 11/20/12 | 18 (200 ng)               | <i>miR-375</i> | undet  | 36.176 | undet  | undet  | 0.109  | undet  |
| E437 | 11/20/12 | 20 (200 ng)               | <i>miR-375</i> | 30.782 | 30.522 | 30.596 | 30.633 | 0.109  | 30.742 |
| E437 | 11/20/12 | 21 (200 ng)               | <i>miR-375</i> | 31.797 | 33.063 | 32.381 | 32.413 | 0.109  | 32.522 |
| E437 | 11/20/12 | 22 (200 ng)               | <i>miR-375</i> | 32.612 | 32.311 | 32.141 | 32.355 | 0.109  | 32.464 |
| E437 | 11/20/12 | 23 (200 ng)               | <i>miR-375</i> | 33.793 | 32.714 | 32.002 | 32.836 | 0.109  | 32.945 |
| E437 | 11/20/12 | 24 (200 ng)               | <i>miR-375</i> | 32.617 | 32.302 | 32.538 | 32.486 | 0.109  | 32.595 |
| E437 | 11/20/12 | U6B std., 10e5            | U6B            | 33.969 | 34.359 | 34.739 | 34.355 | -0.381 | 33.974 |
| E437 | 11/20/12 | U6B std., 10e5            | U6B            | 33.132 | 33.623 | 33.657 | 33.471 | -0.381 | 33.090 |
| E437 | 11/20/12 | U6B std., 10e7            | U6B            | 27.671 | 27.554 | 27.539 | 27.588 | -0.381 | 27.207 |
| E437 | 11/20/12 | U6B std., 10e7            | U6B            | 27.324 | 27.281 | 27.304 | 27.303 | -0.381 | 26.922 |
| E437 | 11/20/12 | <i>miR-205</i> std., 10e5 | <i>miR-205</i> | 25.919 | 25.998 | 25.968 | 25.962 | 0.438  | 26.400 |
| E437 | 11/20/12 | <i>miR-205</i> std., 10e5 | <i>miR-205</i> | 26.162 | 25.887 | 26.238 | 26.096 | 0.438  | 26.534 |
| E437 | 11/20/12 | <i>miR-375</i> std., 10e3 | <i>miR-375</i> | 23.702 | 23.658 | 23.621 | 23.660 | 0.109  | 23.769 |
| E437 | 11/20/12 | <i>miR-375</i> std., 10e3 | <i>miR-375</i> | 23.884 | 23.732 | 23.817 | 23.811 | 0.109  | 23.920 |
| E437 | 11/20/12 | <i>miR-375</i> std., 10e5 | <i>miR-375</i> | 21.772 | 21.773 | 21.674 | 21.740 | 0.109  | 21.849 |
| E437 | 11/20/12 | <i>miR-375</i> std., 10e5 | <i>miR-375</i> | 21.862 | 21.790 | 21.689 | 21.781 | 0.109  | 21.890 |

<sup>a</sup>Identification number (*ID*) of the experiment in which the assay was performed and its date in month-day-year format

<sup>b</sup>Unless noted otherwise, an RT reaction had 5 ng resectate RNA (samples 1-80), or 0.75 ng biopsy RNA (samples A-Y), or  $10^{2-9}$  ( $10e2-9$ ) molecules of a synthetic RNA standard (*std.*)

<sup>c</sup>Mean of  $C_q$  values of triplicate PCR calculated with Microsoft® Excel™ formula:

```
IF(COUNTIF(R, "undet") >1, "undet",
  IF(COUNTIF(R, "undet") =1, AVERAGE(R),
    IF(OR(AND(MAX(R)-MIN(R) <1, AVERAGE(R) <30), AND(MAX(R)-MIN(R) <2, AVERAGE(R) >30)), AVERAGE(R), AVERAGE(MIN(R), MEDIAN(R))))))
```

(*R* = list of triplicate  $C_q$  values; *undet* = undetectable  $C_q$  value)

<sup>d</sup>Raw  $C_q$  value adjusted by adding the calibration factor. Determination of calibration factors is described in Materials and Methods. Calibrated  $C_q$  values are not calculated for data used to generate standard curves, and could not be calculated for *miR-21* for some experiments.

<sup>e</sup>Undetectable  $C_q$  value

**Table S8**

Relative expression, Lebanony score, and molarity values of microRNAs and *U6B* in RNA of lung cancer resectates and biopsies<sup>a</sup>

| Sample | Using raw $C_q$ values |         |         |                |                                | Using calibrated $C_q$ values |         |         |                |                                | $\log_{10}$ molecules |        |         |         |
|--------|------------------------|---------|---------|----------------|--------------------------------|-------------------------------|---------|---------|----------------|--------------------------------|-----------------------|--------|---------|---------|
|        | $\Delta C_q^{U6B}$     |         |         |                |                                | $\Delta C_q^{U6B}$            |         |         |                |                                |                       |        |         |         |
|        | miR-21                 | miR-205 | miR-375 | Lebanony score | miR-375 $\Delta C_q^{miR-205}$ | miR-21                        | miR-205 | miR-375 | Lebanony score | miR-375 $\Delta C_q^{miR-205}$ | U6B                   | miR-21 | miR-205 | miR-375 |
| 1      | -6.00                  | 3.10    | -3.24   | 6.09           | -6.34                          | -7.80                         | 2.91    | -3.47   | 6.81           | -6.38                          | 6.59                  | 6.53   | 3.01    | 3.06    |
| 2      | -4.08                  | 0.73    | -2.17   | 2.77           | -2.90                          | -5.88                         | 0.54    | -2.40   | 3.48           | -2.94                          | 6.47                  | 5.63   | 3.66    | 2.31    |
| 3      | -3.55                  | 1.70    | -0.66   | 3.48           | -2.36                          | -5.35                         | 1.52    | -0.88   | 4.19           | -2.40                          | 6.88                  | 6.02   | 3.86    | 2.33    |
| 4      | -4.22                  | -1.89   | -3.82   | 0.23           | -1.93                          | -6.03                         | -2.07   | -4.04   | 0.94           | -1.97                          | 6.86                  | 6.25   | 5.05    | 3.86    |
| 5      | -8.93                  | 5.58    | -2.87   | 10.05          | -8.46                          |                               | 5.72    | -2.65   |                | -8.38                          | 7.53                  |        | 3.27    | 4.42    |
| 6      | -5.19                  | 1.59    | -4.66   | 4.18           | -6.25                          | -7.00                         | 1.40    | -4.89   | 4.90           | -6.28                          | 6.83                  | 6.58   | 3.84    | 4.22    |
| 6      | -4.50                  | 2.38    | -1.95   | 4.63           | -4.33                          |                               | 2.52    | -1.73   |                | -4.25                          | 7.34                  |        | 4.10    | 3.60    |
| 7      | -8.04                  | 0.90    | -2.12   | 4.92           | -3.02                          |                               | 1.04    | -1.90   |                | -2.94                          | 7.32                  |        | 4.58    | 3.65    |
| 8      | -8.07                  | -8.09   | -4.31   | -4.05          | 3.78                           | -9.53                         | -7.82   | -4.53   | -3.06          | 3.29                           | 5.99                  | 6.34   | 5.89    | 2.48    |
| 9      | -7.84                  | 4.82    | -2.13   | 8.74           | -6.94                          | -9.30                         | 5.08    | -2.35   | 9.73           | -7.43                          | 6.90                  | 7.56   | 2.68    | 3.10    |
| 10     | -4.02                  | -5.37   | 1.59    | -3.36          | 6.96                           | -5.83                         | -5.56   | 1.37    | -2.64          | 6.92                           | 6.79                  | 6.06   | 6.13    | 1.03    |
| 10     | -3.61                  | -5.08   | 1.80    | -3.27          | 6.88                           |                               | -4.94   | 2.02    |                | 6.96                           | 7.16                  |        | 6.40    | 1.41    |
| 11     | -5.86                  | -6.53   | -0.59   | -3.60          | 5.95                           | -7.66                         | -6.72   | -0.81   | -2.89          | 5.91                           | 6.48                  | 6.33   | 6.15    | 1.55    |
| 12     | -5.27                  | 6.41    | -1.60   | 9.04           | -8.01                          | -6.73                         | 6.67    | -1.82   | 10.04          | -8.50                          | 7.10                  | 6.86   | 2.39    | 3.21    |
| 13     | -8.03                  | 2.80    | -3.31   | 6.81           | -6.11                          |                               | 2.94    | -3.09   |                | -6.03                          | 6.94                  |        | 3.46    | 3.54    |
| 14     | -5.53                  | 0.86    | 1.12    | 3.63           | 0.26                           | -7.34                         | 0.67    | 0.89    | 4.34           | 0.22                           | 7.04                  | 7.01   | 4.35    | 1.75    |
| 15     | -8.65                  | -2.99   | -0.70   | 1.34           | 2.29                           |                               | -2.85   | -0.48   |                | 2.37                           | 6.79                  |        | 5.22    | 1.95    |
| 16     | -9.01                  | 1.27    | -0.43   | 5.78           | -1.70                          |                               | 1.41    | -0.21   |                | -1.62                          | 6.88                  |        | 3.89    | 1.98    |
| 17     | -5.60                  | -5.79   | 1.60    | -2.99          | 7.39                           | -7.40                         | -5.97   | 1.38    | -2.27          | 7.35                           | 6.90                  | 6.83   | 6.43    | 1.25    |
| 18     | -4.77                  | -3.16   | 1.12    | -0.77          | 4.27                           | -6.57                         | -3.34   | 0.89    | -0.06          | 4.23                           | 6.81                  | 6.38   | 5.42    | 1.32    |
| 19     | -7.60                  | 0.38    | -3.74   | 4.18           | -4.12                          | -9.06                         | 0.64    | -3.96   | 5.17           | -4.61                          | 6.57                  | 6.99   | 3.76    | 3.27    |
| 20     | -4.40                  | 2.55    | -0.37   | 4.75           | -2.92                          | -5.75                         | 2.74    | -0.60   | 5.61           | -3.34                          | 7.15                  | 6.56   | 3.79    | 2.69    |
| 21     | -4.16                  | 0.32    | -1.95   | 2.40           | -2.27                          | -5.51                         | 0.51    | -2.18   | 3.26           | -2.68                          | 6.91                  | 6.13   | 4.25    | 3.03    |
| 22     | -5.15                  | -4.81   | -0.21   | -2.24          | 4.60                           | -6.50                         | -4.63   | -0.44   | -1.37          | 4.19                           | 7.07                  | 6.73   | 6.18    | 2.45    |
| 23     | -3.88                  | -4.17   | 3.19    | -2.22          | 7.36                           | -5.23                         | -3.98   | 2.97    | -1.36          | 6.94                           | 7.11                  | 6.30   | 6.01    | 0.84    |
| 24     | -4.49                  | 5.94    | 0.78    | 8.19           | -5.16                          | -5.84                         | 6.13    | 0.56    | 9.05           | -5.58                          | 7.26                  | 6.75   | 2.78    | 2.33    |
| 25     | -3.52                  | 4.12    | 0.61    | 5.88           | -3.51                          | -4.87                         | 4.31    | 0.38    | 6.74           | -3.93                          | 7.28                  | 6.41   | 3.43    | 2.45    |
| 26     | -2.80                  | -3.02   | 2.23    | -1.62          | 5.25                           | -4.15                         | -2.83   | 2.00    | -0.76          | 4.84                           | 7.29                  | 6.14   | 5.85    | 1.66    |
| 27     | -3.20                  | 1.68    | -5.13   | 3.27           | -6.81                          | -4.55                         | 1.86    | -5.35   | 4.14           | -7.22                          | 6.99                  | 5.88   | 3.89    | 4.76    |
| 28     | -5.76                  | 6.51    | 3.57    | 9.39           | -2.94                          |                               | 6.65    | 3.79    |                | -2.86                          | 7.65                  |        | 3.10    | 1.44    |
| 29     | -6.17                  | 0.09    | 0.85    | 3.17           | 0.76                           |                               | 0.23    | 1.07    |                | 0.85                           | 7.43                  |        | 5.00    | 2.38    |
| 30     | -4.44                  | -4.96   | 1.34    | -2.74          | 6.30                           | -5.79                         | -4.77   | 1.12    | -1.87          | 5.89                           | 7.14                  | 6.56   | 6.32    | 1.82    |
| 31     | -3.33                  | 4.29    | -1.95   | 5.95           | -6.23                          | -4.68                         | 4.47    | -2.17   | 6.81           | -6.64                          | 7.38                  | 6.48   | 3.50    | 3.90    |
| 32     | -9.97                  | -3.54   | -2.97   | 1.45           | 0.57                           | -11.32                        | -3.35   | -3.19   | 2.31           | 0.16                           | 6.03                  | 7.07   | 4.42    | 1.88    |
| 33     | -7.70                  | 1.51    | -0.54   | 5.36           | -2.05                          | -9.15                         | 1.78    | -0.76   | 6.36           | -2.54                          | 6.65                  | 7.13   | 3.47    | 1.83    |
| 34     | -3.67                  | 5.76    | -1.61   | 7.59           | -7.36                          | -5.02                         | 5.94    | -1.83   | 8.45           | -7.78                          | 7.14                  | 6.27   | 2.70    | 3.29    |
| 35     | -6.47                  | 1.69    | 1.29    | 4.93           | -0.40                          |                               | 1.83    | 1.51    |                | -0.32                          | 7.27                  |        | 4.25    | 1.87    |
| 36     | -3.77                  | 0.87    | -0.35   | 2.76           | -1.22                          | -5.12                         | 1.06    | -0.57   | 3.62           | -1.63                          | 7.34                  | 6.60   | 4.61    | 3.04    |
| 37     | -4.30                  | 5.89    | 1.73    | 8.04           | -4.15                          | -5.65                         | 6.07    | 1.51    | 8.90           | -4.57                          | 7.47                  | 6.98   | 3.06    | 2.24    |



|    |       |       |       |        |        |       |       |       |       |        |      |      |      |       |
|----|-------|-------|-------|--------|--------|-------|-------|-------|-------|--------|------|------|------|-------|
| 38 | -4.16 | -3.07 | 1.25  | -0.99  | 4.32   | -5.51 | -2.88 | 1.02  | -0.13 | 3.90   | 7.26 | 6.63 | 5.84 | 2.10  |
| 39 | -3.73 | -2.24 | -0.82 | -0.37  | 1.42   | -5.08 | -2.05 | -1.04 | 0.49  | 1.01   | 6.52 | 5.40 | 4.61 | 1.73  |
| 40 | -5.15 | 2.25  | 0.39  | 4.83   | -1.86  | -6.50 | 2.44  | 0.17  | 5.69  | -2.27  | 7.17 | 6.87 | 3.91 | 2.34  |
| 41 | -3.74 | -1.03 | 1.36  | 0.84   | 2.39   | -5.09 | -0.84 | 1.14  | 1.70  | 1.98   | 7.36 | 6.60 | 5.27 | 2.22  |
| 42 | -2.24 | 2.73  | -0.73 | 3.85   | -3.47  | -3.59 | 2.92  | -0.96 | 4.71  | -3.88  | 7.52 | 6.27 | 4.21 | 3.57  |
| 43 | -8.53 | -1.40 | -3.16 | 2.87   | -1.76  |       | -1.26 | -2.94 |       | -1.68  | 7.30 |      | 5.33 | 4.12  |
| 44 | -5.55 | -2.62 | 1.67  | 0.15   | 4.29   |       | -2.49 | 1.89  |       | 4.37   | 7.66 |      | 6.21 | 2.41  |
| 45 | -6.80 | 6.06  | 1.15  | 9.46   | -4.90  |       | 6.20  | 1.37  |       | -4.82  | 7.26 |      | 2.76 | 1.91  |
| 46 | -3.73 | 0.11  | 1.35  | 1.98   | 1.24   | -4.87 | 0.15  | 1.13  | 2.58  | 0.98   | 7.52 | 6.75 | 5.14 | 2.52  |
| 47 | -8.13 | -2.77 | -2.72 | 1.29   | 0.05   |       | -2.63 | -2.50 |       | 0.13   | 7.50 |      | 6.05 | 4.28  |
| 48 | -3.87 | -4.33 | 3.63  | -2.40  | 7.96   | -5.00 | -4.30 | 3.41  | -1.80 | 7.70   | 7.27 | 6.44 | 6.32 | 0.92  |
| 49 | -5.95 | -6.20 | 2.09  | -3.22  | 8.29   | -7.09 | -6.16 | 1.86  | -2.62 | 8.03   | 7.22 | 7.18 | 6.90 | 1.60  |
| 50 | -6.12 | 5.42  | -2.84 | 8.48   | -8.26  |       | 5.56  | -2.62 |       | -8.18  | 7.52 |      | 3.30 | 4.38  |
| 51 | -5.41 | 2.17  | -1.88 | 4.88   | -4.05  | -6.55 | 2.21  | -2.11 | 5.48  | -4.31  | 7.02 | 6.68 | 3.80 | 3.19  |
| 52 | -5.06 | -3.42 | -3.02 | -0.89  | 0.40   |       | -3.28 | -2.80 |       | 0.48   | 7.46 |      | 6.22 | 4.36  |
| 53 | -4.58 | 1.91  | 0.98  | 4.19   | -0.92  | -5.71 | 1.94  | 0.76  | 4.80  | -1.18  | 7.18 | 6.59 | 4.10 | 2.08  |
| 54 | -4.56 | 3.28  | -2.09 | 5.56   | -5.37  | -5.70 | 3.31  | -2.31 | 6.16  | -5.63  | 7.41 | 6.91 | 3.93 | 4.02  |
| 55 | -6.50 | -7.01 | 1.09  | -3.76  | 8.10   |       | -6.87 | 1.31  |       | 8.18   | 7.48 |      | 7.47 | 2.36  |
| 56 | -5.40 | 5.60  | 1.04  | 8.30   | -4.56  | -6.54 | 5.64  | 0.82  | 8.90  | -4.82  | 7.40 | 7.23 | 3.13 | 2.46  |
| 57 | -5.49 | -6.67 | -0.57 | -3.92  | 6.10   | -6.63 | -6.63 | -0.79 | -3.32 | 5.84   | 6.51 | 5.97 | 6.14 | 1.58  |
| 58 | -7.95 | 4.71  | -5.84 | 8.69   | -10.56 |       | 4.85  | -5.63 |       | -10.48 | 6.82 |      | 2.65 | 4.56  |
| 59 | -6.97 | 2.21  | -5.18 | 5.69   | -7.38  |       | 2.34  | -4.96 |       | -7.30  | 5.81 |      | 2.21 | 2.34  |
| 60 | -4.20 | -0.40 | -3.36 | 1.70   | -2.96  | -5.34 | -0.37 | -3.58 | 2.30  | -3.21  | 6.96 | 6.13 | 4.60 | 3.81  |
| 61 | -2.43 | -3.95 | 1.24  | -2.74  | 5.19   |       | -3.81 | 1.46  |       | 5.27   | 6.98 |      | 5.79 | 1.35  |
| 62 | -3.72 | -3.03 | 1.71  | -1.17  | 4.74   | -4.85 | -2.99 | 1.49  | -0.56 | 4.48   | 6.94 | 5.91 | 5.46 | 1.25  |
| 63 | -5.44 | -0.30 | -1.77 | 2.43   | -1.47  | -6.90 | -0.03 | -1.99 | 3.42  | -1.96  | 6.88 | 6.61 | 4.38 | 2.87  |
| 64 | -4.70 | 5.75  | 1.61  | 8.10   | -4.14  | -5.83 | 5.79  | 1.39  | 8.70  | -4.40  | 7.03 | 6.42 | 2.61 | 1.49  |
| 65 | -1.66 | 4.90  | 0.61  | 5.73   | -4.29  |       | 5.04  | 0.83  |       | -4.21  | 7.26 |      | 3.15 | 2.19  |
| 66 | -5.11 | -5.36 | 3.78  | -2.81  | 9.15   | -6.57 | -5.10 | 3.56  | -1.82 | 8.66   | 7.02 | 6.69 | 6.28 | 0.39  |
| 67 | -3.55 | 1.17  | -0.77 | 2.94   | -1.93  | -4.69 | 1.20  | -0.99 | 3.55  | -2.19  | 6.78 | 5.63 | 3.85 | 2.20  |
| 68 | -6.08 | 2.03  | -0.90 | 5.07   | -2.93  | -7.22 | 2.06  | -1.12 | 5.67  | -3.19  | 7.07 | 7.00 | 3.91 | 2.80  |
| 70 | -5.79 | -2.42 | -2.52 | 0.47   | -0.10  | -6.92 | -2.39 | -2.74 | 1.08  | -0.36  | 7.20 | 7.08 | 5.60 | 3.85  |
| 71 | -2.84 | -2.64 | 1.84  | -1.22  | 4.48   |       | -2.50 | 2.06  |       | 4.56   | 6.74 |      | 5.04 | 0.61  |
| 74 | -4.27 | 1.29  | -4.89 | 3.43   | -6.18  | -5.41 | 1.33  | -5.12 | 4.03  | -6.44  | 7.12 | 6.38 | 4.23 | 4.87  |
| 75 | -6.19 | 4.04  | -2.76 | 7.14   | -6.80  | -7.33 | 4.08  | -2.99 | 7.74  | -7.06  | 7.11 | 7.10 | 3.29 | 3.80  |
| 76 | -4.79 | 6.34  | -2.27 | 8.74   | -8.61  | -5.93 | 6.37  | -2.49 | 9.34  | -8.87  | 7.35 | 6.92 | 2.82 | 4.01  |
| 77 | -5.31 | 10.51 | -3.24 | 13.16  | -13.75 | -6.44 | 10.54 | -3.47 | 13.76 | -14.01 | 7.27 | 6.99 | 1.30 | 4.33  |
| 78 | -6.31 | -0.13 | -0.58 | 3.03   | -0.45  |       | 0.01  | -0.36 |       | -0.37  | 7.46 |      | 5.11 | 3.15  |
| 79 | -6.85 | -5.11 | 1.26  | -1.69  | 6.38   | -8.31 | -4.85 | 1.04  | -0.70 | 5.89   | 6.89 | 7.17 | 6.04 | 1.40  |
| 80 | -4.08 | -1.59 | 2.91  | 0.45   | 4.50   | -5.22 | -1.56 | 2.68  | 1.05  | 4.24   | 7.20 | 6.42 | 5.31 | 1.15  |
| A  | -5.02 | -0.22 | -6.32 | 2.28   | -6.10  |       | 0.19  | -6.46 |       | -6.65  | 5.17 |      | 2.12 | 1.89  |
| B  | >8.18 | -0.13 | 1.19  | <-4.22 | 1.31   |       | 0.29  | 1.05  |       | 0.76   | 6.15 |      | 3.34 | 0.00  |
| C  | -5.26 | 3.71  | -1.34 | 6.34   | -5.05  |       | 4.12  | -1.48 |       | -5.60  | 6.18 |      | 2.09 | 1.32  |
| D  | -6.75 | -4.74 | -2.54 | -1.36  | 2.19   |       | -4.32 | -2.68 |       | 1.64   | 5.56 |      | 4.15 | 0.75  |
| E  | -6.08 | -5.31 | 1.00  | -2.27  | 6.31   |       | -4.90 | 0.86  |       | 5.76   | 6.18 |      | 5.14 | 0.15  |
| F  | -6.07 | -2.74 | -3.07 | 0.29   | -0.33  |       | -2.33 | -3.21 |       | -0.88  | 4.63 |      | 2.29 | -0.73 |
| G  | -4.78 | -4.01 | -0.41 | -1.62  | 3.60   |       | -3.59 | -0.55 |       | 3.04   | 6.46 |      | 5.06 | 1.38  |
| H  | -5.59 | 2.58  | -3.08 | 5.37   | -5.65  |       | 2.99  | -3.21 |       | -6.21  | 6.01 |      | 2.25 | 1.86  |
| I  | -5.27 | -4.09 | -3.90 | -1.46  | 0.19   |       | -3.95 | -3.68 |       | 0.27   | 4.95 |      | 3.25 | 0.10  |
| J  | -9.16 | -6.51 | -3.35 | -1.93  | 3.16   |       | -6.09 | -3.48 |       | 2.61   | 4.90 |      | 3.91 | -0.08 |
| K  | -7.76 | -5.26 | -5.14 | -1.38  | 0.12   |       | -4.84 | -5.27 |       | -0.43  | 4.92 |      | 3.51 | 0.83  |
| L  | -7.55 | 1.23  | -5.03 | 5.01   | -6.26  |       | 1.65  | -5.17 |       | -6.81  | 5.42 |      | 1.95 | 1.73  |
| M  | -6.32 | 3.23  | -6.71 | 6.39   | -9.94  |       | 3.65  | -6.85 |       | -10.49 | 5.37 |      | 1.21 | 2.46  |
| N  | -6.95 | -5.52 | -3.39 | -2.05  | 2.13   |       | -5.11 | -3.53 |       | 1.58   | 5.28 |      | 4.06 | 0.64  |
| O  | -7.48 | -3.69 | -3.17 | 0.05   | 0.53   |       | -3.28 | -3.30 |       | -0.03  | 5.77 |      | 4.06 | 1.45  |
| P  | -7.63 | 0.24  | -1.13 | 4.06   | -1.37  |       | 0.66  | -1.26 |       | -1.92  | 6.00 |      | 3.03 | 0.87  |
| Q  | -3.52 | -4.03 | 2.45  | -2.27  | 6.48   |       | -3.61 | 2.31  |       | 5.92   | 6.64 |      | 5.29 | 0.30  |

|   |       |       |       |        |        |       |       |        |      |       |      |
|---|-------|-------|-------|--------|--------|-------|-------|--------|------|-------|------|
| R | -6.91 | -5.79 | -4.54 | -2.33  | 1.25   | -5.37 | -4.67 | 0.70   | 5.18 | 4.03  | 1.03 |
| S | -6.08 | >7.66 | -1.09 | >10.70 | <-8.74 | >7.70 | -1.22 | <-8.92 | 6.01 | <0.65 | 0.86 |
| T | -4.27 | -4.52 | -6.25 | -2.38  | -1.74  | -4.10 | -6.39 | -2.29  | 5.81 | 4.39  | 3.05 |
| U | -6.12 | -5.02 | -3.24 | -1.97  | 1.78   | -4.61 | -3.38 | 1.23   | 5.56 | 4.25  | 1.09 |
| V | -3.85 | -4.53 | 1.20  | -2.60  | 5.73   | -4.11 | 1.07  | 5.17   | 6.75 | 5.60  | 1.12 |
| W | -5.21 | -4.42 | -0.17 | -1.82  | 4.26   | -4.01 | -0.30 | 3.71   | 6.46 | 5.19  | 1.24 |
| X | -4.00 | -3.16 | -3.15 | -1.16  | 0.01   | -2.74 | -3.29 | -0.55  | 6.21 | 4.45  | 2.27 |
| Y | -6.21 | 4.03  | -2.27 | 7.13   | -6.29  | 4.44  | -2.40 | -6.85  | 6.38 | 2.23  | 2.15 |

<sup>a</sup>Calculated using data provided in Table S7 and substituting >38 for undetectable  $C_q$  values. The denotation  $X \Delta C_q^Y$  (difference of  $C_q$  values of X and Y) refers to the expression of microRNA X relative to that of RNA Y. The Lebanony score is calculated as  $miR-205 \Delta C_q^{U6B} - (miR-21 \Delta C_q^{U6B})/2$  (Lebanony et al., Journal of Clinical Oncology, 27[12]:2030-7, 2002). Molarity values, indicating the number of molecules present in an RT reaction, are extrapolated from calibrated  $C_q$  values using standard curves generated by linear regression with the least squares fitting technique (Figure S2). Cells for calculations that require calibrated  $C_q$  values for *miR-21* are left blank for samples for which such values are unavailable.
